1 **Vaccine-specific immune responses against *Mycobacterium ulcerans* infection in a low-dose**  
2 **murine challenge model.**

3

4 Kirstie M. Mangas<sup>1</sup>, Andrew H. Buultjens<sup>1</sup>, Jessica L. Porter<sup>1</sup>, Sarah L. Baines<sup>1</sup>, Estelle Marion<sup>2</sup>,  
5 Laurent Marsollier<sup>2</sup>, Nicholas J. Tobias<sup>3,4</sup>, Sacha J. Pidot<sup>1</sup>, Kylie M. Quinn<sup>5</sup>, David J. Price<sup>6,7</sup>, Katherine  
6 Kedzierska<sup>1</sup>, Weiguang Zeng<sup>1</sup>, David C. Jackson<sup>1</sup>, Brendon Y. Chua<sup>1,\*</sup> and Timothy P. Stinear<sup>1,\*</sup>.

7

8

9 1. Department of Microbiology and Immunology, Doherty Institute, University of Melbourne

10 2. CRCINA, INSERM, Université de Nantes, Université d'Angers, Angers, France

11 3. Molekulare Biotechnologie, Fachbereich Biowissenschaften, Goethe-Universität Frankfurt,  
12 Frankfurt am Main, Germany

13 4. LOEWE Centre for Translational Biodiversity in Genomics (TBG), Germany

14 5. Monash Biomedicine Discovery Institute and Department of Biochemistry and Molecular Biology,  
15 Monash University, Clayton, VIC 3800, Australia.

16 6. Victorian Infectious Diseases Reference Laboratory Epidemiology Unit at The Peter Doherty  
17 Institute for Infection & Immunity, The University of Melbourne and Royal Melbourne Hospital, VIC  
18 3000, Australia

19 7. Centre for Epidemiology & Biostatistics, Melbourne School of Population & Global Health, The  
20 University of Melbourne, VIC 3010, Australia

21

22

23 \* Joint senior authors

24 **Running title:** Immune responses against Buruli ulcer

25 **Abstract:**

26 The neglected tropical disease Buruli ulcer (BU) is an infection of subcutaneous tissue with  
27 *Mycobacterium ulcerans*. There is no effective BU vaccine. Here, we assessed an experimental  
28 prime-boost vaccine in a low-dose murine tail infection model. We used the enoyl-reductase (ER)  
29 domain of the *M. ulcerans* mycolactone polyketide synthases electrostatically coupled with a  
30 previously described TLR-2 agonist-based lipopeptide adjuvant, R<sub>4</sub>Pam2Cys. Mice were vaccinated  
31 and then challenged via tail inoculation with 14-20 colony forming units (CFU) of an engineered  
32 bioluminescent strain of *M. ulcerans*. Mice receiving either the experimental ER vaccine or  
33 *Mycobacterium bovis* Bacille Calmette-Guérin (BCG) were equally well protected, with both groups  
34 faring significantly better than non-vaccinated animals ( $p < 0.05$ ). A suite of 29 immune parameters  
35 were assessed in the mice at the end of the experimental period. Multivariate statistical approaches  
36 were then used to interrogate the immune response data to develop disease-prognostic models.  
37 High levels of IL-2 and low IFN- $\gamma$  produced in the spleen best predicted control of infection across  
38 all vaccine groups. Univariate logistic regression then revealed vaccine-specific profiles of  
39 protection. High titres of ER-specific IgG serum antibodies together with IL-2 and IL-4 in the draining  
40 lymph node (DLN) were associated with protection induced by the experimental ER vaccine. In  
41 contrast, high titres of IL-6, TNF- $\alpha$ , IFN- $\gamma$  and IL-10 in the DLN and low IFN $\gamma$  titres in the spleen were  
42 associated with protection following BCG vaccination. This study suggests an effective BU vaccine  
43 must induce localized, tissue-specific immune profiles with controlled inflammatory responses at  
44 the site of infection.

45

46

47

48 **Introduction:**

49 Buruli ulcer (BU) is a disease primarily of the subcutaneous tissue caused by infection with  
50 *Mycobacterium ulcerans*. BU initially presents as redness of the skin that is often accompanied with  
51 oedema and swelling. As the disease progresses, oedema may increase or an open ulcer develop (1,  
52 2), the latter is typically characterised by deep undermined edges with a necrotic core comprised of  
53 bacteria, dead skin cells and immune cells (3, 4). Ulcers are predominately found on the extremities  
54 of the body such as the upper (27% of cases) and lower limbs (70% of cases) (5). The disease is rarely  
55 fatal, but if left untreated extensive destruction of subcutaneous tissue can leave victims with  
56 significant deformities and lifelong disabilities (3, 6-9).

57

58 BU is likely caused when *M. ulcerans* is introduced beneath the skin. This can occur if a region of  
59 contaminated skin surface is punctured or by insertion of an object contaminated with the bacteria  
60 into subcutaneous tissue (e.g. via an insect bite) (10-12). BU-endemic areas include certain regions  
61 of West and Sub-Saharan Africa and south eastern Australia (13, 14).

62

63 *M. ulcerans* is a slow-growing bacterium, with a doubling time greater than 48 hours (15, 16) making  
64 it difficult for early disease diagnosis as symptoms can take between 4-5 months to appear after  
65 primary infection (17, 18). If diagnosed early, however, BU can be treated effectively by combination  
66 antibiotic therapy (19-21). Unfortunately, in many cases the disease can initially be misdiagnosed  
67 as other, more common skin infections. Additionally, a large proportion of BU cases in African  
68 countries occur in rural villages and poorer areas with limited or no access to health care, with  
69 patients facing disfigurement and permanent disability. Given that diagnoses are delayed and  
70 usually occur after a lesion has become relatively advanced and ulceration extensive (22),  
71 development of an effective BU vaccine to protect those in highly endemic areas is of paramount  
72 importance.

73

74 Currently, the only licensed vaccine against mycobacterial infections approved for human use is the  
75 *M. bovis*-derived Bacille Calmette-Guérin (BCG) vaccine for prevention of tuberculosis. This vaccine  
76 is cross-protective against *M. ulcerans*, but only delays the onset of disease (23-25). Several  
77 experimental vaccines have been tested against *M. ulcerans* infection, as summarised in Table 1.  
78 Although different animal models have been utilised to study *M. ulcerans* infections including  
79 guinea pig, primate, pig and armadillo (10, 23, 26-31), most studies assessing vaccine efficacy have  
80 used mice. Vaccines tested in these murine challenge models have included DNA-based, viral-based,  
81 protein subunit and whole cell vaccines (25, 32-35) (Table 1). Among the various vaccines, BCG  
82 expressing *M. ulcerans* antigens appears to offer the best protective effect against challenge. Hart  
83 et al. (36, 37) showed enhanced protection against BU using a recombinant BCG vaccine that  
84 expressed *M. ulcerans* Ag85A or recombinant Ag85B-EsxB fusion protein in a mouse footpad  
85 challenge model. Whilst improving the immunogenicity of BCG may be a promising route, there are  
86 also some drawbacks; exposure to environmental mycobacteria is believed to decrease the efficacy  
87 of the BCG vaccine and administration in areas where people have been BCG-exposed may be  
88 problematic (38).

89

90 *M. ulcerans* causes disease primarily through the production of a lipid toxin called mycolactone (39).  
91 Mycolactone modulates cell function, in particular secretion of critical cytokines by specifically  
92 inhibiting the Sec61 translocon, enabling *M. ulcerans* to escape host immune defences (40-46). The  
93 toxin is formed from simple acetate and propionate precursors by three polyketide synthases (PKS)  
94 encoded by genes on the plasmid pMUM001 (47, 48). Within each PKS are enzymatic domains that  
95 form the mycolactone molecule. Some of these domains have been found to be immunogenic and  
96 in particular immune responses against the enoyl reductase (ER) domain have previously been  
97 shown to significantly reduce *M. ulcerans* bacterial load in the footpad of a murine prime-boost

98 vaccination study (49). Based on the immunogenic and protective qualities of ER, we have utilised  
99 it as a target antigen for a BU subunit vaccine.

100

101 Protein antigens generally require an adjuvant to boost immunogenicity and shape immune  
102 responses. A known TLR-2 ligand, R<sub>4</sub>Pam<sub>2</sub>Cys, has been previously shown to induce robust antibody  
103 responses as well as augmented CD4<sup>+</sup> and CD8<sup>+</sup> T cell responses, possibly through promoting  
104 dendritic cell antigen uptake and trafficking to lymph nodes (50, 51). Given BU is a disease where  
105 the bacteria can be both extracellular and intracellular, the ability of R<sub>4</sub>Pam<sub>2</sub>Cys to robustly engage  
106 multiple arms of the adaptive immune system may be beneficial for a BU subunit vaccine.

107

108 Previous research has shown that as few as three colony forming units (CFU) of bacteria are required  
109 to initiate infection (10), however most animal models challenge with >10<sup>4</sup> CFU (see Table 1) (25,  
110 32-37, 49, 52-54). This dose is likely to be far higher than the dose of bacteria that leads to natural  
111 infection in humans and other animals (10). Such an unrealistic high dose may overwhelm immune  
112 responses and underestimate the true efficacy of potential *M. ulcerans* vaccines. For these reasons,  
113 we have used a low-dose of *M. ulcerans* in a tail infection challenge model to evaluate an  
114 experimental prime-boost subunit vaccine against BU. The experimental subunit vaccine developed  
115 here comprised of the *M. ulcerans* mycolactone ER domain protein formulated with the adjuvant,  
116 R<sub>4</sub>Pam<sub>2</sub>Cys. Our murine challenge model with physiologically relevant dosing enabled us to more  
117 accurately measure vaccine-induced protection and to explore immune correlates of protection  
118 against BU.

119

120

121 **Results:**

122 ***Formulation of the ER-R<sub>4</sub>Pam<sub>2</sub>Cys subunit vaccine candidate***

123 Mycolactone is the key virulence factor produced by *M. ulcerans* and an attractive vaccine target,  
124 but the molecule is poorly immunogenic (55). However, the PKS enzymes used by the bacterium to  
125 synthesize mycolactones – are highly conserved and immunogenic (49, 56-58). Therefore, we  
126 hypothesized that targeting the conserved enzymatic domains of the mycolactone PKS could be an  
127 effective vaccine strategy. One domain in particular, the enoyl reductase (ER) protein domain, elicits  
128 serum antibodies in BU patients and healthy controls in BU endemic regions (57). The ER protein  
129 expressed as an antigen in a DNA-protein prime-boost vaccine has also been shown to reduce  
130 bacterial burden in a mouse footpad *M. ulcerans* challenge model (49). Here, we utilised the ER  
131 protein to create a novel BU vaccine candidate by electrostatically associating it with the TLR-2  
132 agonist-based lipopeptide R<sub>4</sub>Pam<sub>2</sub>Cys. To formulate this vaccine, recombinant 6xHis-tagged ER  
133 protein (37 kDa) was first produced and confirmed by SDS-PAGE (Fig. 1A) and western blotting (Fig.  
134 1B). This protein antigen was formulated with R<sub>4</sub>Pam<sub>2</sub>Cys at various ratios to firstly optimise the  
135 formation of protein-lipopeptide complexes. A ratio of 1:1 was sufficient to produce complexes that  
136 were larger in size than each constituent on its own (Fig. 1C). While the majority of these complexes  
137 were ~300nm in radius (peak 5), the presence of smaller sized particles of ~100nm (peak 4) suggests  
138 that not all antigen was incorporated within a complex as this size range corresponds to the size of  
139 ER protein (peak 3) or R<sub>4</sub>Pam<sub>2</sub>Cys alone (peak 2). Although a 1:3 ratio appears to be more effective  
140 for the association of these constituents, the size distribution of form complexes was not  
141 monodispersed and appeared as two distinct populations (peak 6 and 7). A 1:5 ratio, however,  
142 produced a uniform population of complexes that were ~500 nm in radius (peak 8) and this  
143 formulation was subsequently used to vaccinate animals.

144

145 ***Evaluation of ER-specific antibody responses in vaccinated mice***

146 To evaluate the ability of the vaccine to induce ER-specific antibody responses, mice were  
147 vaccinated, and sera obtained after priming and boosting with the subunit vaccine. Our results  
148 showed that primary vaccination with ER + R<sub>4</sub>Pam<sub>2</sub>Cys resulted in significantly higher levels of ER-  
149 specific antibody compared to vaccination with unadjuvanted ER antigen ( $p < 0.0001$ ) (Fig. 1D). In  
150 fact, there was no significant difference in responses between unvaccinated mice and those  
151 vaccinated with a single dose of ER alone, R<sub>4</sub>Pam<sub>2</sub>Cys only or BCG. Although a second dose of ER  
152 alone was able to increase these responses, the titres were still ~100-fold less than levels achieved  
153 by boosting mice with ER + R<sub>4</sub>Pam<sub>2</sub>Cys ( $p < 0.0001$ ). These results not only indicate that ER-specific  
154 antibodies can be generated in mice and that the use of R<sub>4</sub>Pam<sub>2</sub>Cys can significantly enhance these  
155 responses, but that BCG does not induce cross-reactive antibodies to the ER protein.

156

#### 157 ***Characterisation of a low-dose M. ulcerans murine tail infection model***

158 We have previously described the use of a low-dose tail infection model for studying insect-  
159 mediated transmission of *M. ulcerans* (10). We reasoned that because BU patients were likely to be  
160 initially infected with a low bacterial inoculum (10, 11, 59) we could use this model to test the  
161 protective efficacy of responses induced by the ER + R<sub>4</sub>Pam<sub>2</sub>Cys vaccine. This model features the  
162 use of a bioluminescent strain of *M. ulcerans* (10, 60) and its infectious characteristics are  
163 summarised in Fig. 2. Compared to an uninfected tail (Fig 2A and C), sub-cutaneous infection of a  
164 tail results in the appearance of a visible ulcer (Fig 2B) exhibiting the highest levels of  
165 bioluminescence concentrated around the centre of the lesion (Fig 2D), i.e. where swelling appears  
166 to be the greatest, and beginning to diminish around the periphery reflecting a positive correlation  
167 between bacterial burden and light emission (61). Histological cross-sections revealed that while  
168 tissue integrity of an uninfected tail appears defined and intact (Fig. 2E & F), dramatic differences  
169 are observed in the infected tail, typified by loss of muscle, vasculature and epidermis structure and  
170 disruptions to surrounding connective tissue (Fig. 2G & H). Further examination of this tissue

171 showed the presence of acid-fast bacilli as well as an infiltration of polymorphonuclear cells (PMNs)  
172 (Fig. 2I). Despite evidence of bacteria engulfment by these cells (Fig. 2J), it would appear that this  
173 response was insufficient for controlling the infection and preventing disease progression.

174

#### 175 **Monitoring vaccine efficacy using bioluminescent *M. ulcerans* and in vivo imaging system (IVIS)**

176 We have previously established a correlation between *M. ulcerans* bioluminescence and bacterial  
177 burden (61). Here, we set a threshold of  $\geq 5 \times 10^5$  photons/second (equivalent to  $2.8 \times 10^5$  CFU) as a  
178 measure of ineffective disease control, *i.e.* appearance of disease. Mice were vaccinated  
179 subcutaneously and then challenged with an estimated 17 CFU (range 14-20 CFU) of bioluminescent  
180 *M. ulcerans* via intradermal tail inoculation. Animals were monitored weekly for changes in  
181 bioluminescence using IVIS for up to 24 weeks. Fig. 3A shows an example of the progression of  
182 bioluminescence (and therefore disease) in an unvaccinated mouse, up to week 16 whereupon the  
183 clinical endpoint of the experiment was reached. Bioluminescence for all mice was recorded across  
184 the experimental period. Plots for the different treatment groups show the progression in  
185 bioluminescence over time (Fig3B-F). Mice from the ER alone, R<sub>4</sub>Pam<sub>2</sub>Cys alone and unvaccinated  
186 treatment groups displayed the first detectable bioluminescence at week 7. There also appeared to  
187 be threshold in bioluminescence, whereby animals expressing  $\geq 5 \times 10^5$  photons/second from tail  
188 lesions became less able to control the infection and progressed to the clinical endpoint (Fig. 3B).  
189 The immune response data for all mice is provided (Supplementary Table S1). Using these data,  
190 failure-to-protect was defined as tail bioluminescence equal to or greater than  $5 \times 10^5$   
191 photons/second at or before week 24 (end of experiment). Therefore, mice were defined as  
192 'protected' if bioluminescence was less than  $5 \times 10^5$  photons/second at week 24.

193

#### 194 **Vaccination with ER + R<sub>4</sub>Pam<sub>2</sub>Cys offers similar protection to *M. bovis* BCG vaccine**



195 Survival analysis was conducted to assess vaccine efficacy by measuring the time from infection until  
196 tail bioluminescence at the threshold of  $5 \times 10^5$  photons/second was reached. Mice that reached this  
197 threshold were defined as 'not protected'. Significantly less ER + R<sub>4</sub>Pam<sub>2</sub>Cys vaccinated mice (4/10  
198 animals) developed disease compared to unvaccinated mice (9/10 animals), indicating ER +  
199 R<sub>4</sub>Pam<sub>2</sub>Cys provided some level of protection against disease progression compared to no  
200 vaccination (Fig. 3B, E & G) ( $p < 0.01$ ). Mice vaccinated with BCG were best protected with only 1  
201 animal exceeding the bioluminescence threshold (Fig. 3F & G). Although this number of mice was  
202 reduced compared to the ER + R<sub>4</sub>Pam<sub>2</sub>Cys vaccinated animals, the difference was not significant  
203 (Fig. 3G). However, the bacterial burden (as indicated by mean photon counts/sec at the clinical  
204 endpoint) in BCG vaccinated mice was lower than animals that received the ER + R<sub>4</sub>Pam<sub>2</sub>Cys vaccine  
205 (means:  $6 \times 10^5$  [n=2, range  $3.5 - 8.6 \times 10^5$ ] versus  $3.3 \times 10^7$  [n=3, range  $2.4 - 4.1 \times 10^7$ ] photons/sec  
206 respectively) suggesting the protective superiority of BCG. There was also no significant difference  
207 between the protective efficacy of vaccination with ER alone compared with ER + R<sub>4</sub>Pam<sub>2</sub>Cys,  
208 although mice vaccinated with the latter exhibited delayed disease progression (onset at weeks 16-  
209 24) compared to ER vaccinated mice (onset at weeks 8- 16) indicating that formulation of the  
210 antigen with the R<sub>4</sub>Pam<sub>2</sub>Cys adjuvant improved immunity (Fig. 3D, E).

### 211

### 212 ***Measuring immune parameters following vaccination and challenge***

213 At the experimental end-point, sera, spleens and draining lymph nodes (DLN) from all animals were  
214 collected and several parameters were further analysed; ER-specific antibodies, CD4<sup>+</sup> and CD8<sup>+</sup> T  
215 cells and a panel of 11 murine Th1, Th2 and Th17 cytokines. After *M. ulcerans* challenge, mice  
216 vaccinated with ER alone or ER + R<sub>4</sub>Pam<sub>2</sub>Cys were found to exhibit significantly more ER-specific  
217 antibodies than the other treatment groups (Fig 4A) despite not being fully protected. This indicates  
218 that, even though the ER protein is highly immunogenic, anti-ER antibodies do not appear to play a  
219 major role in controlling infection.

220 We next investigated if there were any differences in the ability of T cells harvested from the spleens  
221 of vaccinated mice to produce cytokines following stimulation with recombinant ER protein  
222 (Supplementary Table S1). Our results showed that the numbers of IFN- $\gamma$  producing CD4<sup>+</sup> T cells  
223 across all vaccine groups did not differ, and in some cases, were higher in unvaccinated mice  
224 compared to those vaccinated with ER + R<sub>4</sub>Pam<sub>2</sub>Cys vaccine group (Fig 4B) indicating that there was  
225 no clear correlation between the frequencies of these cells and protection. Similarly, there also did  
226 not appear to be any correlation between TNF- $\alpha$ <sup>+</sup> CD4<sup>+</sup> T cells, IFN- $\gamma$ <sup>+</sup> CD8<sup>+</sup> T cells or TNF- $\alpha$ <sup>+</sup> CD8<sup>+</sup> T  
227 cells and protection (Supplementary Table S1).

228  
229 Comparing levels of cytokine production between vaccine groups also did not clearly identify any  
230 cytokines that correlated with protection (see Supplementary Table S1). For example, higher levels  
231 of TNF- $\alpha$  were present in the spleens of unvaccinated mice than BCG vaccinated mice (Fig 4C) and  
232 even though BCG vaccination resulted in significantly more IFN- $\gamma$  in draining lymph nodes compared  
233 to unvaccinated mice, this was not observed for ER + R<sub>4</sub>Pam<sub>2</sub>Cys vaccinated mice (Fig 4D).

234  
235 We therefore based our analysis on comparisons between diseased or protected mice irrespective  
236 of the vaccines they received (Fig. 4E,F). Herein, we identified significant increases of IL-2, IL-6, IL-  
237 10 IL-17A, IFN- $\gamma$ , MIP-1b, TNF- $\alpha$  in the lymph nodes of protected mice (Fig. 4F) and significant  
238 increases of IFN- $\gamma$ , IL-6, and TNF- $\alpha$  in the spleens of diseased mice (Fig. 4E). While these data  
239 implicate these cytokines as correlates of protection and disease, it did not rank the importance of  
240 each cytokine towards either outcome.

#### 241 242 ***Identifying immune responses that predict vaccination outcome***

243 To identify the immune parameters (features) that associate with the response variable ‘vaccine  
244 protection’ (here measured as time to reach our bioluminescence detection threshold) independent

245 of the vaccine used, we conducted a univariate regression analysis using the Cox proportional  
246 hazards model. We used this model as it accounts for the fact that a subset of mice (observations)  
247 was right-censored, as vaccination outcomes were not measured after 24 weeks post challenge. For  
248 each of the 28 immunological features, their association with the response variable (time-to-  
249 bioluminescence measured in weeks) was ranked using concordance index (CI) scores. The CI is  
250 analogous to the area under the ROC curve, with a CI value of 0.5 indicating a random correlation  
251 and 1 indicating a perfect, positive correlation (62). The CI for each univariate regression analysis  
252 was used to rank the strength of association for each of the 28 features against the response  
253 variable. Using a CI cut-off of 0.70, the top six features were identified as well as the direction of  
254 their association with prevention of development of bioluminescence (Table 2). Low levels of IFN- $\gamma$   
255 and high levels of IL-2 produced in mouse splenocytes were the top two immune parameter features  
256 influencing this model, reflected in the individual correlation between their respective titres and  
257 time-to-bioluminescence (Fig. 5A, B).

258  
259 Next, using these top six features, we performed unsupervised machine learning to reveal any  
260 structure without the influence of labels, such as arbitrarily imposed bioluminescence thresholds.  
261 Here, the data separated into two main clusters. K-means clustering was then applied to assign mice  
262 (observations) to the two cluster groups. Inspection of the resulting cluster membership with  
263 respect to time to bioluminescence showed a separation of the mice either side of 17 weeks post  
264 *M. ulcerans* challenge (Fig. 5C).

265  
266 Given that the clusters identified through unsupervised learning closely resembled a temporal  
267 breakpoint at 17 weeks, we further investigated this binary divide in the data. We used multivariate  
268 logistic regression and developed a low-error classifier that could generalize to unseen data, using  
269 the underlying structure apparent in the immunological data. We then tested the classifier through

270 extensive cross-validation. Observations (mice) with bioluminescence above threshold between  
271 weeks 8-17 were assigned a '0' and '1' for those with bioluminescence detected in weeks 18-24 or  
272 no detection throughout the experiment period. The model included the top six features (Table 2)  
273 and was validated through 1,000 random train test splits, with 90% of observations comprising the  
274 training groups at each split. The resulting classifier probabilities were used to calculate the area  
275 under the ROC curve, AUC = 0.91 (True negatives = 1774, True positives = 2662, False negatives =  
276 120, False positives = 444). The low error and generalizable nature of this classifier demonstrates  
277 the existence of a robust structure in the data, in the form of two clusters separated around week  
278 17 (Fig. 5D) and highlights the strong association of the six identified immune parameters with  
279 outcome. Most notably here it appears that tissue specific immune responses are important, with  
280 a correlation between the appearance of a tail ulcer and evidence of a systemic (spleen) responses  
281 and protection correlating with both local (draining lymph nodes) and systemic (spleen) response  
282 (Table 2). This association of BU and the production of inflammatory cytokines (IL-6, IFN- $\gamma$  and TNF)  
283 as possible markers of infection, indicated that we could also identify correlates of immune  
284 protection against BU.

285

### 286 ***Assessment of vaccine-specific immune responses***

287 To dissect the immune responses associated with ER + R<sub>4</sub>Pam<sub>2</sub>Cys vaccination versus BCG and the  
288 different controls we noted the differences in the percentage of observations (mice) belonging to  
289 specific treatment groups between the two clusters observed above (Fig. 5C) separated by week 17.  
290 This summary was reflective of the survival analysis and showed that unvaccinated mice and those  
291 that received the adjuvant or ER alone were predominantly in the weeks 8-17 cluster, while ER +  
292 R<sub>4</sub>Pam<sub>2</sub>Cys and BCG-vaccinated mice were predominantly in the weeks 18-24 cluster (Fig. 5E). In  
293 order to obtain the individual immune profile of the different treatment groups, group-specific  
294 univariate logistic regression analyses were undertaken. Here, the response variable was coded as

295 a '1' for membership in a particular group and '0' for membership in all other groups. Analyses were  
296 conducted for each of the five treatment groups and the model coefficient weights were used to  
297 determine both the strength and direction of association of each feature with that of each  
298 treatment group. The resulting  $p$ -values from the model coefficients were used to assess  
299 significance of the associations (Fig. 5F, Supplementary Table S2). The combination of the ER antigen  
300 and R<sub>4</sub>Pam<sub>2</sub>Cys together were important for inducing protective responses that associated with  
301 local production of IL-4, IL-2, IL-17A in the DLN, in addition to ER-specific antibody responses.  
302 Neither ER antigen or R<sub>4</sub>Pam<sub>2</sub>Cys alone induced this profile and protection using the former was  
303 only linked to ER- but not *M. ulcerans*-specific antibody responses (post-challenge timepoints). In  
304 comparison, BCG vaccination-mediated protection was associated with a greater breadth of  
305 localised cytokines responses than ER + R<sub>4</sub>Pam<sub>2</sub>Cys, with higher IL-6, TNF- $\alpha$  and MIP-1 $\beta$  in the DLN.  
306 Of note, evidence of systemic inflammation, such as IL-17A and IFN- $\gamma$  in the spleen was associated  
307 with poorer BCG performance.

308

## 309 **Discussion**

310 In this study, we investigated various immune parameters induced by the use of BCG and an  
311 experimental subunit vaccine against BU and sought to identify immune correlates associated with  
312 protection in a mouse tail infection model. Studies have shown that the tail is a suitable location for  
313 infection as BU predominantly affects extremities (11, 52, 63) and in combination with the use of  
314 bioluminescent *M. ulcerans*, offers several advantages over footpad, hock or ear infections used in  
315 most BU vaccine studies (as shown in Table 1 and (64)). Tail infections are less likely to affect mouse  
316 mobility, or cause rapid tissue loss and may also prevent added trauma, inflammation or secondary  
317 infections at the challenge site (65). A key feature of this model also allows the use of a significantly  
318 lower bacterial challenge dose compared to other studies (approximately 14-20 CFU compared to  
319 10<sup>4</sup>-10<sup>6</sup> CFU) (25, 32-37, 49, 52-54) (Table 1) and enables measuring bacterial growth in the same

320 animal over time. This lower dose is likely to be more physiologically relevant, in terms of reflecting  
321 the bacterial inoculum that occurs during *M. ulcerans* transmission to humans (10, 11, 59). Sporadic  
322 healing of BU disease was also seen in this model, an observation that has been noted in humans  
323 and other animals (29, 66-68).

324

325 Vaccination with the ER + R<sub>4</sub>Pam<sub>2</sub>Cys formulation resulted in protection of 60% of mice from BU  
326 challenge. Although more of these vaccinated mice reached our defined disease outcome after 24  
327 weeks compared to BCG-vaccinated mice, the difference was not statistically significant. There was  
328 also no significant difference in the number of mice displaying any bioluminescence between each  
329 group. The fact that ER + R<sub>4</sub>Pam<sub>2</sub>Cys was significantly more protective than vaccination with  
330 R<sub>4</sub>Pam<sub>2</sub>Cys alone indicates any non-antigen specific triggering of innate immune responses by this  
331 adjuvant (69, 70) (71) was not sufficient for conferring long-lasting protection and the inclusion of  
332 the ER protein was necessary to achieve any protective effects. This was further evident by  
333 vaccinating with ER alone. Despite not seeing any clear significant differences in the clinical  
334 outcomes at the end of the trial when compared to ER + R<sub>4</sub>Pam<sub>2</sub>Cys vaccination, the inclusion of  
335 R<sub>4</sub>Pam<sub>2</sub>Cys delayed disease onset by ~8 weeks and correlated with the induction of significantly  
336 more ER-specific antibodies after a primary and booster vaccination.

337

338 The presence of these antibodies was nonetheless insufficient to provide total protection against  
339 *M. ulcerans* challenge. This is perhaps not unexpected given that other studies have also reported  
340 little correlation between strong BU antibodies and protection, in mice (34) or sera of BU patients  
341 (57, 72). To identify other immune correlates associated with the protective effects observed in our  
342 study, a Cox proportional hazards regression model was utilized. Here, the univariate analyses  
343 allowed us to identify the top six features that most strongly associated with differences in time to  
344 detection of bioluminescence. These models assume normalized data, and although we cannot infer

345 how much an increase or decrease in units could affect the clinical outcome, we are able to rank  
346 each factor based on its contribution to either disease or protection. This model also considers the  
347 effect of each factor in delaying the onset of disease rather than just modelling through a binary  
348 'protected' or 'diseased' outcome. Similar regression modelling has been described to predict  
349 outcomes for tuberculosis patients after treatment, effect of hospital-acquired *Clostridium difficile*  
350 on hospital stay and survival of *Staphylococcus aureus* in milk (73-75). The model assumes that  
351 eventually all mice will succumb to disease and due to the constraints in our data, it cannot  
352 determine threshold levels of cytokines that will predict disease outcomes.

353  
354 The cytokines most associated with protection in BCG mice were different to those identified in  
355 mice vaccinated with ER+R<sub>4</sub>Pam<sub>2</sub>Cys, which is not surprising given that BCG is a multi-antigen live-  
356 attenuated vaccine and thus likely to utilise both common and distinct protective responses and  
357 mechanisms to those induced by our vaccine candidate.

358  
359 Through multivariate logistic regression modelling we identified the presence of IL-2 in the spleen  
360 and lymph nodes as markers that were most strongly associated with protection. Although there  
361 are no studies that directly link IL-2 with protection against *M. ulcerans*, it plays a key role in the  
362 differentiation, proliferation and maintenance of T cell responses (76). Therefore, it is perhaps not  
363 surprising that its role in this murine model is likely to be important for the induction of protective  
364 adaptive immunity against *M. ulcerans*.

365  
366 However, our results did not show any correlation between levels of cytokine producing CD4<sup>+</sup> and  
367 CD8<sup>+</sup> T cells and protection in vaccinated groups despite studies that have shown them to play a  
368 role in BU control (77, 78). In particular, *M. ulcerans*-specific CD4<sup>+</sup> T cells have been found to migrate  
369 to the site of infection from draining lymph nodes early in infection but are depleted as the infection

370 persists (77), an effect that could be attributed to the ability of the *M. ulcerans* exotoxin  
371 mycolactone to impair T cell and macrophage function (41, 44, 78).

372

373 In addition, we also identified the presence of systemic IL-6, TNF- $\alpha$  and IFN- $\gamma$  (in the spleen) to be  
374 strongly associated with disease. IL-6 is a pro-inflammatory cytokine produced by many cell types  
375 in response to pathogens and is linked to the production of TNF- $\alpha$ , both of which can be detected  
376 in BU lesions and serum of BU patients (78, 79) (80). TNF- $\alpha$  in particular, plays a key role in  
377 inflammatory cell recruitment and in conjunction with IFN- $\gamma$ , increases the phagocytic ability of  
378 macrophages to enhance killing of mycobacteria (81, 82). However many studies have shown that  
379 mycolactone suppresses TNF- $\alpha$  production by T cells and especially macrophages (83, 84),  
380 decreasing their ability to control BU infection (85).

381

382 IFN- $\gamma$  itself has also been shown to be important for controlling *M. ulcerans* infection as IFN- $\gamma$   
383 deficient mice cannot prevent the onset of disease (86). It is also detected at high levels in patients  
384 with both developed ulcers and early lesions (87) and healed ulcers (88) where it is believed to  
385 mediate macrophage function (89) and drive iNOS expression to facilitate bacterial killing (90).  
386 Altogether, the fact that these cytokines are elevated at a systemic level in the diseased animals in  
387 our study but not in lymph nodes draining from the tail suggests that their activity is being  
388 dampened at the site of infection. These effects do not appear to be present in protected animals  
389 where increased levels of cytokines are detected in the draining lymph node and not the spleen. In  
390 fact, the localised, but not systemic presence, of these and other cytokines including IL17A, MIP1b  
391 and IL10 are strongly associated with protection.

392

393 Although most of the immunosuppression during BU infection can be attributed to mycolactone,  
394 chronic inflammation can also be key driver as noted by the increased splenic cytokine levels. Many



395 cell types have been implicated as the cause of immunosuppression in cancers, chronic viral  
396 infections (such as HCV, HIV, HBV) and even *M. tuberculosis* infection. These include myeloid-  
397 derived suppressor cells (MDSCs) (91) regulatory T cells (T<sub>reg</sub>) (92) and T helper 17 (T<sub>h</sub>17) (93), which  
398 can suppress effector T cell function and inhibit NK and dendritic cell activity through direct cell-to-  
399 cell interactions or the production of immunosuppressive cytokines. MDSCs in particular can be  
400 recruited by IFN- $\gamma$  (94) and IL-6 (95), both of which are found in higher levels in our unprotected  
401 mice. On the other hand, while T<sub>h</sub>17 cells are crucial for the control of infection, especially  
402 extracellular bacterial and fungal infections, elevated frequencies can lead to tissue inflammation  
403 alongside matrix destruction, autoimmunity and vascular activation (96). The observation that  
404 higher systemic IL-17A correlates with the lack of protection suggests that these cells play a role in  
405 determining BU disease outcomes.

406

407 Tissue changes due to chronic infection could also play a compounding effect on the severity of BU  
408 disease outcomes. Our histological analysis of BU-infected tail tissue showed a loss of muscle and  
409 epidermis, changes in connective tissue and loss of vasculature which may explain why lymphocytes  
410 and other immune cells are unable to access the sites of greatest infection and tissue damage. BU  
411 tissue necrosis can also extend some distance from the site of bacterial colonisation, an observation  
412 that led to the identification of mycolactone as the cause of coagulative necrosis (39, 97, 98).  
413 Mycolactone has been well described as causing cell death to skin-resident cells such as fibroblasts,  
414 adipocytes, keratinocytes and endothelial cells (39, 99, 100). Primary human dermal microvascular  
415 endothelial cells are especially sensitive to mycolactone and after exposure lose their ability to  
416 activate a key anticoagulant protein (protein C) after exposure, causing a reduction in intravascular  
417 fluidity and preventing immune cell infiltration to the infection site (99). Thus, the combination of  
418 immunosuppressive immune host responses and tissue destruction, in conjunction with

419 mycolactone at the site of infection, may increase the risk for poorer disease outcomes for those  
420 chronically infected with BU.

421

422 Although we have identified several factors associated with disease and protection, our results  
423 provide impetus to further expand these profiles and establish their importance. For example,  
424 changes in cytokines levels before challenge and throughout the infection phase could be monitored  
425 and integrated into models, as well as analysing frequencies of various other innate- and adaptive-  
426 immune cell populations and identifying those that produce cytokines of interest. In evaluating and  
427 demonstrating that a subunit vaccine can protect against BU in our mouse challenge model, albeit  
428 not as efficacious as BCG, our results showed that protection can be mediated through different  
429 immune mechanisms. Disease progression was also commonly linked to the presence of pro-  
430 inflammatory cytokines in the spleen and not the lymph node. These profiles indicate that localised  
431 and not systemic responses are more important for conferring protection and also provide a  
432 template that could guide the design and development of novel vaccination strategies against BU.

433

434 Finally, we conclude that the mycolactone biosynthesis pathway constitutes a viable vaccine target  
435 to protect against *M. ulcerans*. As *M. ulcerans* is slow-growing and requires its highly conserved  
436 mycolactone PKS for virulence, the development of resistance is unlikely. As such, approaches based  
437 on the use of multiple PKS enzymatic domains may prove even more efficacious. Moreover, studies  
438 that have introduced *M. ulcerans* and *M. marinum*-specific proteins into BCG have been shown to  
439 increase its protective effect. Collectively, this demonstrates the additive power of using a broader  
440 suite of antigens and the potential for a viable vaccine against BU.

441

## 442 **Methods:**

443 *Strains and culture conditions.*

444 *Escherichia coli* ClearColi©BL21 (DE3) containing the plasmid, pJexpress-ER (strain TPS847) was  
445 grown at 37°C in Luria-Bertani (LB) broth (Difco, Becton Dickinson, MD, USA) supplemented with  
446 100 µg/ml ampicillin (Sigma-Aldrich, USA) to express the enoyl reductase (ER) protein (57). Log-  
447 phase bioluminescent *Mycobacterium ulcerans* (strain JKD8049 containing integrated plasmid  
448 pMV306 *hsp:luxG13*) (10, 60) was grown at 30°C in 7H9 broth or 7H10 agar (Middlebrook, Becton  
449 Dickinson, MD, USA) supplemented with oleic acid, albumin, dextrose and catalase growth  
450 supplement (OADC) (Middlebrook, Becton Dickinson, MD, USA), 0.5% glycerol (v/v) and 25 µg/ml  
451 kanamycin (Sigma-Aldrich, USA). *M. bovis* BCG (strain 'Danish 1331') used for vaccinations was  
452 grown at 37°C in 7H9 broth or 7H10 agar supplemented with OADC. Mycobacterial colony counts  
453 from cultures or tissue specimens were performed using spot plating as previously described (10).  
454 All culture extracts were screened by LC-MS for the presence of mycolactones as previously  
455 described to ensure bacteria used in transmission experiments remained fully virulent (101).

456

#### 457 *Recombinant protein expression*

458 Overnight culture of *E. coli* TPS847 was diluted to OD<sub>600</sub> = 0.05 in LB broth. The culture was incubated  
459 at 37°C with shaking at 200 rpm until OD<sub>600</sub> = 0.6-0.7, followed by the addition of 1 mM IPTG  
460 (Isopropyl b-D-1-thiogalactopyr-anoside) to induce protein expression for a further four hours. Cells  
461 were then resuspended in wash buffer (8 M urea, 150 mM sodium chloride, 10% glycerol) and  
462 sonicated at amplitude 60 (QSonica Ultrasonic Liquid Processor S-4000, Misonix) until the solution  
463 turned clear. The lysate was filtered with a 0.22 µM filter (Millipore) to remove cellular debris and  
464 protein was column-purified using anti-histidine resin (ClonTech). The resin was washed with wash  
465 buffer which was gradually replaced with tris buffer (20 mM Tris-HCl, 150 mM sodium chloride, 10%  
466 glycerol) over ten washes followed by two washes with tris buffer containing 20 mM imidazole.  
467 Protein was eluted in tris buffer containing 200 mM imidazole and dialysed in phosphate buffered  
468 saline (PBS) before concentration using a microcon column (Millipore). Proteins were tested for

469 endotoxin contamination using Pierce™ limulus amoebocyte lysate assay (Thermo Scientific™) and  
470 relative size was confirmed by sodium dodecyl sulphate polyacrylamide gel electrophoresis.

471  
472 *Sodium dodecyl sulphate polyacrylamide gel electrophoresis (SDS-PAGE)*

473 Samples were denatured in an equal volume of 2 x sample loading buffer (40% (v/v) 0.5M Tris-HCL  
474 pH6.8, 10% glycerol, 1.7% (w/v) SDS, 10% 2-B-mercaptoethanol, 0.13% (w/v) bromophenol blue in  
475 distilled water) at 100°C for 5 minutes. Ten microlitres of each sample and SeeBlue® Plus2 pre-  
476 stained protein standard (Invitrogen) was loaded onto a 0.5mm 12% polyacrylamide gel under  
477 reducing conditions, as previously described (102). The gel was run in buffer containing 0.3% (w/v)  
478 Tris, 1.44% (w/v) glycine and 0.1% (w/v) SDS in distilled water for 1 hour at 150 volts (Mini-protean  
479 vertical electrophoresis cell, Bio-Rad), stained in Coomassie stain (45% methanol, 10% acetic acid  
480 0.25% (w/v) Coomassie brilliant blue in distilled water) for 1 hour and destained in Coomassie  
481 destain (33% Methanol, 10% acetic acid, 60% distilled water) until protein bands were visualised.

482  
483 *Western Blotting*

484 Protein separated on a 12% polyacrylamide gel was transferred to a nitrocellulose membrane in a  
485 tris-glycine transfer buffer (1.5 mM Tris, 12mM glycine, 15 % methanol (v/v) in distilled water) for 1  
486 hour at 100 volts (Mini Trans-Blot Cell, Bio-Rad) and incubated in blocking buffer (5% (w/v) skim  
487 milk powder and 0.1% Tween-20 in PBS) overnight at 4°C. The membrane was then incubated with  
488 anti6xHIS-HRP antibody (Roche Applied Science, USA) at 1:500 dilution for 2 hours and washed in  
489 PBS containing 0.1% Tween-20 prior to exposure to developing solution (Western Lighting  
490 Chemiluminescence kit, Perkin Elmer, USA) according to the manufacturer's guidelines.  
491 Chemiluminescence was detected using an MF ChemiBIS gel imaging system (DNR Bio-Imaging  
492 Systems, Israel).

493

494 *Particle size analysis of protein antigen and lipopeptide formulations by dynamic light scattering*  
495 *(DLS)*

496 The association between protein and R<sub>4</sub>Pam<sub>2</sub>Cys was measured using dynamic light scattering (DLS)  
497 by mixing 5 µg of protein with increasing amounts of lipopeptide in 50 µl PBS. The size distribution  
498 of particles in solution (presented as hydrodynamic radius) were measured in 4µl of cyclin olefin co-  
499 polymer cuvettes using a DynaPro NanoStar DLS instrument (Wyatt Technology, CA, USA) equipped  
500 with 658nm laser with a scattering angle of 90°. Measurements were acquired in triplicate with each  
501 measurement consisting of 30 readings at 5 second intervals at 25°C. Data was analysed using  
502 Dynamics software (v7.1.7.16).

503

504 *Vaccination of animals*

505 The synthesis and purification of the branched cationic lipopeptide, R<sub>4</sub>Pam<sub>2</sub>Cys, was performed as  
506 previously described (103, 104). Each vaccine dose contained 25 µg protein formulated in PBS with  
507 R<sub>4</sub>Pam<sub>2</sub>Cys at a 1:5 molar ratio of protein to lipopeptide in a final volume of 100 µl. Live-attenuated  
508 *M. bovis* BCG strain 'Danish 1331' was grown to log phase and stored at -80°C in 20% glycerol until  
509 used. Bacteria were washed with PBS and resuspended in 200ul, before administration at 4.7 x 10<sup>5</sup>  
510 bacteria per dose. All vaccines and control formulations were sonicated for 5 minutes in a waterbath  
511 sonicator before being administered.

512

513 Female 6-week old BALB/c mice were sourced from ARC (Canning Vale, Australia) and housed in  
514 individual ventilated cages. Food and water were given *ad libitum*. Experiments were approved by  
515 The University of Melbourne Animal Ethics Committee (Approval identification number: 1613870).  
516 For vaccination using R<sub>4</sub>Pam<sub>2</sub>Cys, animals were inoculated subcutaneously at the base of tail (100µl  
517 per dose at 50 µl per flank) and boosted 21 days later with the same formulations. Mice vaccinated

518 with *M. bovis* BCG were given one dose subcutaneously in a similar manner (200 µl per dose at 100µl  
519 per flank). There were 10 mice in each vaccination group.

520

#### 521 *M. ulcerans* challenge

522 Mice were challenged with bioluminescent *M. ulcerans* on day 35 as described previously (10).  
523 Briefly, tails of isoflurane anaesthetised mice were dipped in 7H9 culture containing log-phase  
524 bioluminescent *M. ulcerans* bacteria (concentration  $1.27 \times 10^6$  CFU/mL (range:  $1.07 \times 10^6$  –  $1.46 \times 10^6$   
525 CFU). Contaminated tails were then pierced once subcutaneously with a sterile 25-G needle. The  
526 infectious dose was calculated to be 17 CFU (range: 14-20) using methods previously described (10).  
527 Mice were allowed to recover and monitored for up to 24 weeks after infection and sacrificed when  
528 tail ulceration was observed wherein spleens, lymph nodes and sera were harvested for  
529 immunological analysis.

530

#### 531 *IVIS imaging*

532 Infected mice were imaged weekly from 6-weeks post-infection to detect the emission of  
533 bioluminescence. Images were captured using the Lumina XRS Series III In Vitro Imaging System  
534 (IVIS®) (Perkin Elmer, MA, USA) and Living Image Software v3.2 with the following settings: Field of  
535 View 24, relative aperture  $f'1.2$ , medium binning, 60s exposure. Bioluminescence was calculated  
536 using Living Image Software v3.2.

537

#### 538 *Serum antibody titre measurements*

539 Serum antibody titres were measured by enzyme linked immunosorbent assay (ELISA) (105) using  
540 plates (Nunc, Thermo Scientific) that were previously coated with antigen overnight, either purified  
541 recombinant ER protein or heat-killed whole cell *M. ulcerans* lysate. The presence of bound  
542 antibodies were detected by incubating serum-exposed wells with horse radish peroxidase

543 conjugated rabbit anti-mouse IgG (Dako, Glostrup, Denmark) for 2 hours followed by the addition  
544 of the enzyme substrate (0.2mM ABTS in 50mM citric acid containing 0.004% hydrogen peroxide  
545 and left to develop for 10-15 minutes before the addition of 50nM sodium fluoride to stop the  
546 reaction. Plates were read at dual wavelengths of 505 and 595 nm on plate reader (LabSystems  
547 Multiskan Multisoft microplate reader) and antibody titres expressed as the reciprocal of the  
548 highest dilution of serum required to achieve an optical density of 0.2.

549

#### 550 *Intracellular cytokine staining*

551 Single cell suspensions were derived from the spleen and draining lymph nodes and resuspended in  
552 RP10 media (RPMI 1640 (Sigma) supplemented with 10% foetal bovine serum (Gibco, ThermoFisher  
553 Scientific, Waltham, MA USA), 2mM L-glutamine, 1mM sodium pyruvate, 55  $\mu$ M 2-  
554 mercaptoethanol, 12  $\mu$ g gentamycin, 100 U/ml penicillin and 100  $\mu$ g/ml streptomycin). Spleen and  
555 lymph node-derived cells were cultured in 96-well plates (CoStar, Corning, USA) at  $1 \times 10^7$  cells/per  
556 well and  $1 \times 10^5$  cells/well, respectively 200  $\mu$ l of RP10 containing 10 U/ml IL-2 (Roche, Mannheim,  
557 Germany), 1 $\mu$ g/ml plate-bound anti-CD28 (BD Pharmingen, Becton Dickinson, Clone 37.51) and 20  
558  $\mu$ g/ml ER protein for 12 hours at 37°C in 5% CO<sub>2</sub>. Golgiplug (1 $\mu$ g/ml) (Becton Dickinson) was added  
559 for the last 4 hours of incubation. Cells were then stained with 7AAD-Live/Dead stain dye (Biolegend,  
560 CA, USA), BV510-anti-B220 (BD Horizon, Becton Dickinson, Clone RA3-6B2), BV605-antiCD4  
561 (Biolegend, Clone RM4-5), APC-Cy7-anti-TCRb (BD Pharmingen, Clone H57-597) and PE-Cy7-anti-  
562 CD8 (BD Pharmingen, Clone 53-6.7) anti-mouse monoclonal antibodies at 4°C in the dark.  
563 Intracellular staining was performed by fixing cells with Cytofix/Cytoperm solution (Becton  
564 Dickinson, USA) followed by permeabilisation and intracellular staining with Perm/Wash buffer  
565 (Becton Dickinson) and BV786-IFN- $\gamma$  (BD Horizon, Clone XM G1.2), AF647-IL-17A (BD Pharmingen,  
566 Becton Dickinson, Clone TCII-18H10) and PE-TNF- $\alpha$  (BD Biosciences, Clone MP6-XT22) antibodies

567 for 30 minutes at 4°C before analysis on an LSR Fortessa flow cytometer (BD Biosciences, US). Data  
568 analyses were performed using FlowJo (Tree Star, OR, USA).

569

#### 570 *Cytokine Bead Array*

571 Spleen and lymph node-derived cells were incubated in 500 µl RP10 supplemented with 25 µg/ml  
572 ER protein for 72 hours at 37°C in 5% CO<sub>2</sub>. Supernatant was collected and a cytokine bead array was  
573 performed using a mouse flex set (BD Biosciences, USA) to detect IL-2, IL-4, IL-6, IL-10, IL-12/IL-  
574 23p40, IL-17, IFN-γ, TNF, MCP-1, MIP1α, MIP1β as per the manufacturer's instructions. Samples  
575 were acquired using a FACSCanto II flow cytometer (BD Biosciences) and cytokine quantities  
576 calculated using FCAP Array™ Software v3.0.

577

#### 578 *Histology and microscopy*

579 Tail tissues from the site of infection were fixed in PBS containing 10% non-buffered formalin then  
580 embedded in paraffin and sliced into 10 µM thick segments. The sliced segments were Ziehl  
581 Neelsen- or H&E-stained prior to microscope imaging. Images of tail segments were captured using  
582 a light microscope (Olympus BX53 Light microscope, Olympus-Life Science).

583

#### 584 *Statistical analysis*

585 GraphPad Prism software (GraphPad Software v7, CA, USA) was used to perform statistical analyses  
586 on the antibody titre, time to luminescence, T cell numbers and cytokine titre data. Antibody titres  
587 were analysed using one-way ANOVA with Tukey's correction for multiple comparisons. The time to  
588 bioluminescence data was displayed as a Kaplan-Meier plot and differences determined using a Log-  
589 Rank (Mantel-Cox) test. Mann-Whitney tests were performed to compare cytokine titres between  
590 protected and diseased mice and for comparisons between vaccination groups. All tests were  
591 conducted at the 5% significance level.



592

593 *Statistical modelling*

594 Twenty-eight data features (*i.e.* the immune parameters measured in each mouse, refer to Table  
595 S1) were transformed using the R package *bestNormalize* (106). Transformed features were then  
596 normalised (between 0 and 1 for each feature) using the *MinMaxScaler* function of *Scikit-learn*  
597 (107). As many of the vaccination outcome observations (time-to-bioluminescence) were right-  
598 censored, we employed the Cox proportional hazards regression analysis using the *Scikit-survival*  
599 module of *Scikit-learn* in Python (108). Here, univariate analyses were run for each of the 28 features  
600 using the continuous response variable of time-to-bioluminescence. The standard metric for  
601 assessing the predictive performance of a survival model is the concordance index (CI) (62, 109,  
602 110). A CI >0.7 was used to identify the top six features of this model. Unsupervised learning and  
603 data dimensionality reduction is an ideal way to identify structure in continuous data without the  
604 influence of labels. The method of *t-Distributed Stochastic Neighbor Embedding* (t-SNE) is a  
605 dimensionality reduction technique that retains both the global structure and local layout of the  
606 high-dimensional data through exchanging the Euclidean distances between all pair of data points  
607 into heavy-tailed conditional probabilities (111). This method is advantageous over conventional  
608 principal component analysis (PCA), as it does not rely on a linear assumption and can capture  
609 nonlinear relationships (111). We explored the data, independent of labels, by reducing the top six  
610 features obtained from the Cox proportional hazards regression analysis to a two-dimensional space  
611 using the t-SNE package in *Scikit-learn* (107) . The two clusters detected through visual inspection  
612 were objectively defined, with observations assigned to two groups using K-means clustering, as  
613 implemented in *Scikit-learn* (107). A multivariate logistic regression classifier was then built using  
614 the top six features, with the two clusters identified by *t-SNE* as the response variables. To reduce  
615 the possibility of over-fitting, the model was validated through 1,000 random train-test splits, in  
616 which 90% of the observations made up each training set. These models were built using the logistic

617 regression classifier as implemented in *Scikit-learn* (107) and Receiver-Operator-Characteristic  
618 curves were used to evaluate model performance (112). In order to assess the immune features  
619 that were associated with different vaccination groups, a univariate logistic regression analysis was  
620 then conducted for each group using *R* (112). The estimated model coefficients were used to assess  
621 the direction and strength of the association, and the corresponding p-value used to determine  
622 statistical significance at the 5% significance level.

623 **Acknowledgments:** We thank Laura Leone for expert assistance with histology. This research was  
624 supported by the National Health and Medical Research Council, Australia (GNT1008549). The  
625 funders had no role in study design, data collection and interpretation, or the decision to submit  
626 the work for publication.

627

628

629 **References:**

- 630 1. Guarner J, Bartlett J, Whitney EA, Raghunathan PL, Stienstra Y, Asamo K, Etuaful S, Klutse  
631 E, Quarshie E, van der Werf TS, van der Graaf WT, King CH, Ashford DA. 2003.  
632 Histopathologic features of *Mycobacterium ulcerans* infection. *Emerg Infect Dis* 9:651-656.
- 633 2. Vincent QB, Ardant MF, Adeye A, Goundote A, Saint-Andre JP, Cottin J, Kempf M,  
634 Agossadou D, Johnson C, Abel L, Marsollier L, Chauty A, Alcais A. 2014. Clinical  
635 epidemiology of laboratory-confirmed Buruli ulcer in Benin: a cohort study. *Lancet Glob*  
636 *Health* 2:e422-30.
- 637 3. Hayman J, McQueen A. 1985. The pathology of *Mycobacterium ulcerans* infection.  
638 *Pathology* 17:594-600.
- 639 4. Oliveira MS, Fraga AG, Torrado E, Castro AG, Pereira JP, Filho AL, Milanezi F, Schmitt FC,  
640 Meyers WM, Portaels F, Silva MT, Pedrosa J. 2005. Infection with *Mycobacterium ulcerans*  
641 induces persistent inflammatory responses in mice. *Infect Immun* 73:6299-310.
- 642 5. Yerramilli A, Tay EL, Stewardson AJ, Kelley PG, Bishop E, Jenkin GA, Starr M, Trevillyan J,  
643 Hughes A, Friedman ND, O'Brien DP, Johnson PDR. 2017. The location of Australian Buruli  
644 ulcer lesions-Implications for unravelling disease transmission. *PLoS Negl Trop Dis*  
645 11:e0005800.
- 646 6. van der Werf TS, van der Graaf WT, Tappero JW, Asiedu K. 1999. *Mycobacterium ulcerans*  
647 infection. *Lancet* 354:1013-8.
- 648 7. Pszolla N, Sarkar MR, Strecker W, Kern P, Kinzl L, Meyers WM, Portaels F. 2003. Buruli  
649 ulcer: a systemic disease. *Clin Infect Dis* 37:e78-82.
- 650 8. Loftus MJ, Tay EL, Globan M, Lavender CJ, Crouch SR, Johnson PDR, Fyfe JAM. 2018.  
651 Epidemiology of Buruli Ulcer Infections, Victoria, Australia, 2011-2016. *Emerg Infect Dis*  
652 24:1988-1997.
- 653 9. Toll A, Gallardo F, Ferran M, Gilaberte M, Iglesias M, Gimeno JL, Rondini S, Pujol RM. 2005.  
654 Aggressive multifocal Buruli ulcer with associated osteomyelitis in an HIV-positive patient.  
655 *Clin Exp Dermatol* 30:649-51.
- 656 10. Wallace JR, Mangas KM, Porter JL, Marcsisin R, Pidot SJ, Howden B, Omansen TF, Zeng W,  
657 Axford JK, Johnson PDR, Stinear TP. 2017. *Mycobacterium ulcerans* low infectious dose and  
658 mechanical transmission support insect bites and puncturing injuries in the spread of Buruli  
659 ulcer. *PLoS Negl Trop Dis* 11:e0005553.
- 660 11. Marsollier L, Robert R, Aubry J, Saint Andre JP, Kouakou H, Legras P, Manceau AL, Mahaza  
661 C, Carbonnelle B. 2002. Aquatic insects as a vector for *Mycobacterium ulcerans*. *Appl*  
662 *Environ Microbiol* 68:4623-8.
- 663 12. Meyers WM, Shelly WM, Connor DH, Meyers EK. 1974. Human *Mycobacterium ulcerans*  
664 infections developing at sites of trauma to skin. *Am J Trop Med Hyg* 23:919-23.

- 665 13. Buultjens AH, Vandelannoote K, Meehan CJ, Eddyani M, de Jong BC, Fyfe JAM, Globan M,  
666 Tobias NJ, Porter JL, Tomita T, Tay EL, Seemann T, Howden BP, Johnson PDR, Stinear TP.  
667 2018. Comparative Genomics Shows That *Mycobacterium ulcerans* Migration and  
668 Expansion Preceded the Rise of Buruli Ulcer in Southeastern Australia. *Appl Environ*  
669 *Microbiol* 84.
- 670 14. Simpson H, Deribe K, Tabah EN, Peters A, Maman I, Frimpong M, Ampadu E, Phillips R,  
671 Saunderson P, Pullan RL, Cano J. 2019. Mapping the global distribution of Buruli ulcer: a  
672 systematic review with evidence consensus. *Lancet Glob Health* 7:e912-e922.
- 673 15. Stinear TP, Seemann T, Pidot S, Frigui W, Reysset G, Garnier T, Meurice G, Simon D,  
674 Bouchier C, Ma L, Tichit M, Porter JL, Ryan J, Johnson PD, Davies JK, Jenkin GA, Small PL,  
675 Jones LM, Tekaiia F, Laval F, Daffe M, Parkhill J, Cole ST. 2007. Reductive evolution and  
676 niche adaptation inferred from the genome of *Mycobacterium ulcerans*, the causative  
677 agent of Buruli ulcer. *Genome Res* 17:192-200.
- 678 16. Marsollier L, Stinear T, Aubry J, Saint Andre JP, Robert R, Legras P, Manceau AL, Audrain C,  
679 Bourdon S, Kouakou H, Carbonnelle B. 2004. Aquatic plants stimulate the growth of and  
680 biofilm formation by *Mycobacterium ulcerans* in axenic culture and harbor these bacteria  
681 in the environment. *Appl Environ Microbiol* 70:1097-103.
- 682 17. Loftus MJ, Trubiano JA, Tay EL, Lavender CJ, Globan M, Fyfe JAM, Johnson PDR. 2018. The  
683 incubation period of Buruli ulcer (*Mycobacterium ulcerans* infection) in Victoria, Australia -  
684 Remains similar despite changing geographic distribution of disease. *PLoS Negl Trop Dis*  
685 12:e0006323.
- 686 18. Trubiano JA, Lavender CJ, Fyfe JA, Bittmann S, Johnson PD. 2013. The incubation period of  
687 Buruli ulcer (*Mycobacterium ulcerans* infection). *PLoS Negl Trop Dis* 7:e2463.
- 688 19. Sarfo FS, Phillips R, Asiedu K, Ampadu E, Bobi N, Adentwe E, Lartey A, Tetteh I,  
689 Wansbrough-Jones M. 2010. Clinical efficacy of combination of rifampin and streptomycin  
690 for treatment of *Mycobacterium ulcerans* disease. *Antimicrob Agents Chemother* 54:3678-  
691 85.
- 692 20. Nienhuis WA, Stienstra Y, Thompson WA, Awuah PC, Abass KM, Tuah W, Awua-Boateng  
693 NY, Ampadu EO, Siegmund V, Schouten JP, Adjei O, Bretzel G, van der Werf TS. 2010.  
694 Antimicrobial treatment for early, limited *Mycobacterium ulcerans* infection: a randomised  
695 controlled trial. *Lancet* 375:664-72.
- 696 21. Wadagni AC, Barogui YT, Johnson RC, Sopoh GE, Affolabi D, van der Werf TS, de Zeeuw J,  
697 Kleinnijenhuis J, Stienstra Y. 2018. Delayed versus standard assessment for excision surgery  
698 in patients with Buruli ulcer in Benin: a randomised controlled trial. *Lancet Infect Dis*  
699 18:650-656.
- 700 22. Zingue D, Bouam A, Tian RBD, Drancourt M. 2018. Buruli Ulcer, a Prototype for Ecosystem-  
701 Related Infection, Caused by *Mycobacterium ulcerans*. *Clin Microbiol Rev* 31.
- 702 23. Tanghe A, Adnet PY, Gartner T, Huygen K. 2007. A booster vaccination with *Mycobacterium*  
703 *bovis* BCG does not increase the protective effect of the vaccine against experimental  
704 *Mycobacterium ulcerans* infection in mice. *Infect Immun* 75:2642-4.
- 705 24. Converse PJ, Almeida DV, Nueremberger EL, Grosset JH. 2011. BCG-mediated protection  
706 against *Mycobacterium ulcerans* infection in the mouse. *PLoS Negl Trop Dis* 5:e985.
- 707 25. Fraga AG, Martins TG, Torrado E, Huygen K, Portaels F, Silva MT, Castro AG, Pedrosa J.  
708 2012. Cellular immunity confers transient protection in experimental Buruli ulcer following  
709 BCG or mycolactone-negative *Mycobacterium ulcerans* vaccination. *PLoS One* 7:e33406.
- 710 26. Walsh DS, Dela Cruz EC, Abalos RM, Tan EV, Walsh GP, Portaels F, Meyers WM. 2007.  
711 Clinical and histologic features of skin lesions in a cynomolgus monkey experimentally  
712 infected with *Mycobacterium ulcerans* (Buruli ulcer) by intradermal inoculation. *Am J Trop*  
713 *Med Hyg* 76:132-4.

- 714 27. Ortiz RH, Leon DA, Estevez HO, Martin A, Herrera JL, Romo LF, Portaels F, Pando RH. 2009.  
715 Differences in virulence and immune response induced in a murine model by isolates of  
716 *Mycobacterium ulcerans* from different geographic areas. Clin Exp Immunol 157:271-81.
- 717 28. Bolz M, Ruggli N, Ruf MT, Ricklin ME, Zimmer G, Pluschke G. Experimental infection of the  
718 pig with *Mycobacterium ulcerans*: a novel model for studying the pathogenesis of Buruli  
719 ulcer disease.
- 720 29. Marion E, Jarry UA-Ohoo, Cano C, Savary CA-Ohoo, Beauvillain CA-Ohoo, Robbe-Saule M,  
721 Preisser L, Altare F, Delneste Y, Jeannin P, Marsollier L. FVB/N Mice Spontaneously Heal  
722 Ulcerative Lesions Induced by *Mycobacterium ulcerans* and Switch M. *ulcerans* into a Low  
723 Mycolactone Producer.
- 724 30. Benard AA-OhooX, Sala C, Pluschke G. *Mycobacterium ulcerans* Mouse Model Refinement  
725 for Pre-Clinical Profiling of Vaccine Candidates.
- 726 31. Walsh DS, Meyers Wm Fau - Krieg RE, Krieg Re Fau - Walsh GP, Walsh GP. Transmission of  
727 *Mycobacterium ulcerans* to the nine-banded armadillo.
- 728 32. Tanghe A, Content J, Van Vooren JP, Portaels F, Huygen K. 2001. Protective efficacy of a  
729 DNA vaccine encoding antigen 85A from *Mycobacterium bovis* BCG against Buruli ulcer.  
730 Infect Immun 69:5403-11.
- 731 33. Tanghe A, Dangy JP, Pluschke G, Huygen K. 2008. Improved protective efficacy of a species-  
732 specific DNA vaccine encoding mycolyl-transferase Ag85A from *Mycobacterium ulcerans* by  
733 homologous protein boosting. PLoS Negl Trop Dis 2:e199.
- 734 34. Bolz M, Benard A, Dreyer AM, Kerber S, Vettiger A, Oehlmann W, Singh M, Duthie MS,  
735 Pluschke G. 2016. Vaccination with the Surface Proteins MUL\_2232 and MUL\_3720 of  
736 *Mycobacterium ulcerans* Induces Antibodies but Fails to Provide Protection against Buruli  
737 Ulcer. PLoS Negl Trop Dis 10:e0004431.
- 738 35. Hart BE, Hale LP, Lee S. 2016. Immunogenicity and protection conferred by a recombinant  
739 *Mycobacterium marinum* vaccine against Buruli ulcer. Trials in Vaccinology 5:88-91.
- 740 36. Hart BE, Hale LP, Lee S. 2015. Recombinant BCG Expressing *Mycobacterium ulcerans* Ag85A  
741 Imparts Enhanced Protection against Experimental Buruli ulcer. PLoS Negl Trop Dis  
742 9:e0004046.
- 743 37. Hart BE, Lee S. 2016. Overexpression of a *Mycobacterium ulcerans* Ag85B-EsxH Fusion  
744 Protein in Recombinant BCG Improves Experimental Buruli Ulcer Vaccine Efficacy. PLoS  
745 Negl Trop Dis 10:e0005229.
- 746 38. Gowthaman U, Mushtaq K, Tan AC, Rai PK, Jackson DC, Agrewala JN. 2015. Challenges and  
747 solutions for a rational vaccine design for TB-endemic regions. Crit Rev Microbiol 41:389-  
748 98.
- 749 39. George KM, Chatterjee D, Gunawardana G, Welty D, Hayman J, Lee R, Small PL. 1999.  
750 Mycolactone: a polyketide toxin from *Mycobacterium ulcerans* required for virulence.  
751 Science 283:854-7.
- 752 40. Ogbechi J, Hall BS, Sbarrato T, Taunton J, Willis AE, Wek RC, Simmonds RE. 2018. Inhibition  
753 of Sec61-dependent translocation by mycolactone uncouples the integrated stress  
754 response from ER stress, driving cytotoxicity via translational activation of ATF4. Cell Death  
755 & Disease 9:397.
- 756 41. Baron L, Paatero AO, Morel JD, Impens F, Guenin-Mace L, Saint-Auret S, Blanchard N,  
757 Dillmann R, Niang F, Pellegrini S, Taunton J, Paavilainen VO, Demangel C. 2016.  
758 Mycolactone subverts immunity by selectively blocking the Sec61 translocon. J Exp Med  
759 213:2885-2896.
- 760 42. Coutanceau E, Decalf J, Martino A, Babon A, Winter N, Cole ST, Albert ML, Demangel C.  
761 2007. Selective suppression of dendritic cell functions by *Mycobacterium ulcerans* toxin  
762 mycolactone. J Exp Med 204:1395-403.

- 763 43. Meier JL, Burkart MD. 2011. Proteomic analysis of polyketide and nonribosomal peptide  
764 biosynthesis. *Curr Opin Chem Biol* 15:48-56.
- 765 44. Boulkroun S, Guenin-Mace L, Thoulouze MI, Monot M, Merckx A, Langsley G, Bismuth G, Di  
766 Bartolo V, Demangel C. 2010. Mycolactone suppresses T cell responsiveness by altering  
767 both early signaling and posttranslational events. *J Immunol* 184:1436-44.
- 768 45. Pahlevan AA, Wright DJ, Andrews C, George KM, Small PL, Foxwell BM. 1999. The inhibitory  
769 action of *Mycobacterium ulcerans* soluble factor on monocyte/T cell cytokine production  
770 and NF-kappa B function. *J Immunol* 163:3928-35.
- 771 46. Torrado E, Fraga AG, Logarinho E, Martins TG, Carmona JA, Gama JB, Carvalho MA, Proença  
772 F, Castro AG, Pedrosa J. 2010. IFN- $\gamma$ -Dependent Activation of Macrophages during  
773 Experimental Infections by *Mycobacterium ulcerans*; Is Impaired by  
774 the Toxin Mycolactone. *The Journal of Immunology* 184:947.
- 775 47. Stinear TP, Mve-Obiang A, Small PL, Frigui W, Pryor MJ, Brosch R, Jenkin GA, Johnson PD,  
776 Davies JK, Lee RE, Adusumilli S, Garnier T, Haydock SF, Leadlay PF, Cole ST. 2004. Giant  
777 plasmid-encoded polyketide synthases produce the macrolide toxin of *Mycobacterium*  
778 *ulcerans*. *Proc Natl Acad Sci U S A* 101:1345-9.
- 779 48. Stinear TP, Pryor MJ, Porter JL, Cole ST. 2005. Functional analysis and annotation of the  
780 virulence plasmid pMUM001 from *Mycobacterium ulcerans*. *Microbiology* 151:683-92.
- 781 49. Roupie V, Pidot SJ, Einarsdottir T, Van Den Poel C, Jurion F, Stinear TP, Huygen K. 2014.  
782 Analysis of the vaccine potential of plasmid DNA encoding nine mycolactone polyketide  
783 synthase domains in *Mycobacterium ulcerans* infected mice. *PLoS Negl Trop Dis* 8:e2604.
- 784 50. Chua BY, Zeng W, Jackson DC. 2008. Synthesis of toll-like receptor-2 targeting lipopeptides  
785 as self-adjuvanting vaccines. *Methods Mol Biol* 494:247-61.
- 786 51. Wang Z, Kedzierski L, Nuessing S, Chua BY, Quinones-Parra SM, Huber VC, Jackson DC,  
787 Thomas PG, Kedzierska K. 2016. Establishment of memory CD8+ T cells with live attenuated  
788 influenza virus across different vaccination doses. *J Gen Virol* 97:3205-3214.
- 789 52. Coutanceau E, Legras P, Marsollier L, Reysset G, Cole ST, Demangel C. 2006.  
790 Immunogenicity of *Mycobacterium ulcerans* Hsp65 and protective efficacy of a  
791 *Mycobacterium leprae* Hsp65-based DNA vaccine against Buruli ulcer. *Microbes Infect*  
792 8:2075-81.
- 793 53. Trigo G, Martins TG, Fraga AG, Longatto-Filho A, Castro AG, Azeredo J, Pedrosa J. 2013.  
794 Phage therapy is effective against infection by *Mycobacterium ulcerans* in a murine  
795 footpad model. *PLoS Negl Trop Dis* 7:e2183.
- 796 54. Watanabe M, Nakamura H, Nabekura R, Shinoda N, Suzuki E, Saito H. 2015. Protective  
797 effect of a dewaxed whole-cell vaccine against *Mycobacterium ulcerans* infection in mice.  
798 *Vaccine* 33:2232-9.
- 799 55. Dangy JP, Scherr N, Gersbach P, Hug MN, Bieri R, Bomio C, Li J, Huber S, Altmann KH,  
800 Pluschke G. 2016. Antibody-Mediated Neutralization of the Exotoxin Mycolactone, the  
801 Main Virulence Factor Produced by *Mycobacterium ulcerans*. *PLoS Negl Trop Dis*  
802 10:e0004808.
- 803 56. Porter JL, Tobias NJ, Pidot SJ, Falgner S, Tuck KL, Vettiger A, Hong H, Leadlay PF, Stinear TP.  
804 2013. The cell wall-associated mycolactone polyketide synthases are necessary but not  
805 sufficient for mycolactone biosynthesis. *PLoS One* 8:e70520.
- 806 57. Pidot SJ, Porter JL, Marsollier L, Chauty A, Migot-Nabias F, Badaut C, Benard A, Ruf MT,  
807 Seemann T, Johnson PD, Davies JK, Jenkin GA, Pluschke G, Stinear TP. 2010. Serological  
808 evaluation of *Mycobacterium ulcerans* antigens identified by comparative genomics. *PLoS*  
809 *Negl Trop Dis* 4:e872.

- 810 58. Pidot SJ, Hong H, Seemann T, Porter JL, Yip MJ, Men A, Johnson M, Wilson P, Davies JK,  
811 Leadlay PF, Stinear TP. 2008. Deciphering the genetic basis for polyketide variation among  
812 mycobacteria producing mycolactones. BMC Genomics 9:462.
- 813 59. Meyers Wm Fau - Shelly WM, Shelly Wm Fau - Connor DH, Connor Dh Fau - Meyers EK,  
814 Meyers EK. Human Mycobacterium ulcerans infections developing at sites of trauma to  
815 skin.
- 816 60. Omansen TF, Porter JL, Johnson PDR, van der Werf TS, Stienstra Y, Stinear TP. 2015. In-vitro  
817 Activity of Avermectins against Mycobacterium ulcerans. PLoS Neglected Tropical Diseases  
818 9:e0003549.
- 819 61. Omansen TF, Marcsisin RA, Chua BY, Zeng W, Jackson DC, Porter JL, Stienstra Y, van der  
820 Werf TS, Stinear TP. 2019. In Vivo Imaging of Bioluminescent Mycobacterium ulcerans: A  
821 Tool to Refine the Murine Buruli Ulcer Tail Model. Am J Trop Med Hyg In Press.
- 822 62. Van Belle V, Pelckmans K, Van Huffel S, Suykens JA. 2011. Support vector methods for  
823 survival analysis: a comparison between ranking and regression approaches. Artif Intell  
824 Med 53:107-18.
- 825 63. Marion E, Jarry U, Cano C, Savary C, Beauvillain C, Robbe-Saule M, Preisser L, Altare F,  
826 Delneste Y, Jeannin P, Marsollier L. 2016. FVB/N Mice Spontaneously Heal Ulcerative  
827 Lesions Induced by Mycobacterium ulcerans and Switch M. ulcerans into a Low  
828 Mycolactone Producer. Journal of Immunology 196:2690-2698.
- 829 64. Bénard A, Sala C, Pluschke G. 2016. Mycobacterium ulcerans Mouse Model Refinement for  
830 Pre-Clinical Profiling of Vaccine Candidates. PLOS ONE 11:e0167059.
- 831 65. Kamala T. Hock immunization: a humane alternative to mouse footpad injections.
- 832 66. O'Brien DP, Murrie A, Meggyesy P, Priestley J, Rajcoomar A, Athan E. 2019. Spontaneous  
833 healing of Mycobacterium ulcerans disease in Australian patients. PLoS Negl Trop Dis  
834 13:e0007178.
- 835 67. Marion E, Chauty A, Kempf M, Le Corre Y, Delneste Y, Croue A, Marsollier L. 2016. Clinical  
836 Features of Spontaneous Partial Healing During Mycobacterium ulcerans Infection. Open  
837 Forum Infect Dis 3:ofw013.
- 838 68. Silva-Gomes R, Marcq E, Trigo G, Gonçalves CM, Longatto-Filho A, Castro AG, Pedrosa J,  
839 Fraga AG. 2015. Spontaneous Healing of Mycobacterium ulcerans Lesions in the Guinea Pig  
840 Model. PLoS Neglected Tropical Diseases 9:e0004265.
- 841 69. Tan AC, Mifsud Ej Fau - Zeng W, Zeng W Fau - Edenborough K, Edenborough K Fau -  
842 McVernon J, McVernon J Fau - Brown LE, Brown Le Fau - Jackson DC, Jackson DC. Intranasal  
843 administration of the TLR2 agonist Pam2Cys provides rapid protection against influenza in  
844 mice.
- 845 70. Mifsud EJ, Tan AC, Reading PC, Jackson DC. Mapping the pulmonary environment of  
846 animals protected from virulent H1N1 influenza infection using the TLR-2 agonist  
847 Pam(2)Cys.
- 848 71. Mifsud EJ, Tan AC, Short KR, Brown LE, Chua BY, Jackson DC. Reducing the impact of  
849 influenza-associated secondary pneumococcal infections.
- 850 72. Gooding TM, Johnson PD, Campbell DE, Hayman JA, Hartland EL, Kemp AS, Robins-Browne  
851 RM. 2001. Immune response to infection with *Mycobacterium ulcerans*. Infect Immun  
852 69:1704-7.
- 853 73. Tolosie K, Sharma MK. Application of cox proportional hazards model in case of  
854 tuberculosis patients in selected addis ababa health centres, ethiopia.
- 855 74. Cole Sr Fau - Hudgens MG, Hudgens MG. Survival analysis in infectious disease research:  
856 describing events in time.
- 857 75. Forster AJ, Taljaard M, Oake N, Wilson K, Roth V, van Walraven C. 2012. The effect of  
858 hospital-acquired infection with Clostridium difficile on length of stay in hospital. CMAJ :

- 859 Canadian Medical Association journal = journal de l'Association medicale canadienne  
860 184:37-42.
- 861 76. Kalia V, Sarkar S. 2018. Regulation of Effector and Memory CD8 T Cell Differentiation by IL-  
862 2-A Balancing Act. *Front Immunol* 9:2987.
- 863 77. Fraga AG, Cruz A Fau - Martins TG, Martins Tg Fau - Torrado E, Torrado E Fau - Saraiva M,  
864 Saraiva M Fau - Pereira DR, Pereira Dr Fau - Meyers WM, Meyers Wm Fau - Portaels F,  
865 Portaels F Fau - Silva MT, Silva Mt Fau - Castro AG, Castro Ag Fau - Pedrosa J, Pedrosa J.  
866 *Mycobacterium ulcerans* triggers T-cell immunity followed by local and regional but not  
867 systemic immunosuppression.
- 868 78. Phillips R, Sarfo FS, Guenin-Mace L, Decalf J, Wansbrough-Jones M, Albert ML, Demangel C.  
869 2009. Immunosuppressive signature of cutaneous *Mycobacterium ulcerans* infection in the  
870 peripheral blood of patients with buruli ulcer disease. *J Infect Dis* 200:1675-84.
- 871 79. Kiszewski AE, Becerril E, Aguilar LD, Kader IT, Myers W, Portaels F, Hernandez Pando R.  
872 2006. The local immune response in ulcerative lesions of Buruli disease. *Clin Exp Immunol*  
873 143:445-51.
- 874 80. Peduzzi E, Groeper C Fau - Schutte D, Schutte D Fau - Zajac P, Zajac P Fau - Rondini S,  
875 Rondini S Fau - Mensah-Quainoo E, Mensah-Quainoo E Fau - Spagnoli GC, Spagnoli Gc Fau -  
876 Pluschke G, Pluschke G Fau - Daubenberger CA, Daubenberger CA. Local activation of the  
877 innate immune system in Buruli ulcer lesions.
- 878 81. Ray JCJ, Wang J, Chan J, Kirschner DE. 2008. The timing of TNF and IFN-gamma signaling  
879 affects macrophage activation strategies during *Mycobacterium tuberculosis* infection.  
880 *Journal of theoretical biology* 252:24-38.
- 881 82. Cavalcanti YV, Brelaz MC, Neves JK, Ferraz JC, Pereira VR. 2012. Role of TNF-Alpha, IFN-  
882 Gamma, and IL-10 in the Development of Pulmonary Tuberculosis. *Pulm Med*  
883 2012:745483.
- 884 83. Hall BS, Hill K, McKenna M, Ogbechi J, High S, Willis AE, Simmonds RE. 2014. The  
885 Pathogenic Mechanism of the *Mycobacterium ulcerans* Virulence Factor, Mycolactone,  
886 Depends on Blockade of Protein Translocation into the ER. *PLOS Pathogens* 10:e1004061.
- 887 84. Pahlevan AA, Wright DJM, Andrews C, George KM, Small PLC, Foxwell BM. 1999. The  
888 Inhibitory Action of &em&gt;*Mycobacterium ulcerans*&/em&gt; Soluble Factor on  
889 Monocyte/T Cell Cytokine Production and NF-κB Function. *J Immunol* 163:3928.
- 890 85. Torrado E, Adusumilli S, Fraga AG, Small PLC, Castro AG, Pedrosa J. 2007. Mycolactone-  
891 Mediated Inhibition of Tumor Necrosis Factor Production by Macrophages Infected with  
892 *Mycobacterium ulcerans* Has Implications for the Control of Infection. *Infect Immun*  
893 75:3979.
- 894 86. Bieri R, Bolz M, Ruf M-T, Pluschke G. 2016. Interferon-γ Is a Crucial Activator of Early Host  
895 Immune Defense against *Mycobacterium ulcerans* Infection in Mice. *PLOS Negl Trop Dis*  
896 10:e0004450.
- 897 87. Phillips R, Horsfield C, Mangan J, Laing K, Etuaful S, Awuah P, Nyarko K, Osei-Sarpong F,  
898 Butcher P, Lucas S, Wansbrough-Jones M. 2006. Cytokine mRNA expression in  
899 *Mycobacterium ulcerans*-infected human skin and correlation with local inflammatory  
900 response. *Infect Immun* 74:2917-24.
- 901 88. Westenbrink BD, Stienstra Y, Huitema MG, Thompson WA, Klutse EO, Ampadu EO, Boezen  
902 HM, Limburg PC, van der Werf TS. 2005. Cytokine responses to stimulation of whole blood  
903 from patients with Buruli ulcer disease in Ghana. *Clin Diagn Lab Immunol* 12:125-9.
- 904 89. Torrado E, Fraga AG, Logarinho E, Martins TG, Carmona JA, Gama JB, Carvalho MA, Proenca  
905 F, Castro AG, Pedrosa J. 2010. IFN-gamma-dependent activation of macrophages during  
906 experimental infections by *Mycobacterium ulcerans* is impaired by the toxin mycolactone. *J*  
907 *Immunol* 184:947-55.



- 908 90. Flynn JL, Chan J. 2001. Immunology of tuberculosis. *Annu Rev Immunol* 19:93-129.
- 909 91. Magcwebeba T, Dorhoi A, du Plessis N. 2019. The Emerging Role of Myeloid-Derived  
910 Suppressor Cells in Tuberculosis. *Front Immunol* 10:917.
- 911 92. Boer MC, Joosten SA, Ottenhoff TH. 2015. Regulatory T-Cells at the Interface between  
912 Human Host and Pathogens in Infectious Diseases and Vaccination. *Front Immunol* 6:217.
- 913 93. Isailovic N, Daigo K, Mantovani A, Selmi C. 2015. Interleukin-17 and innate immunity in  
914 infections and chronic inflammation. *J Autoimmun* 60:1-11.
- 915 94. Greifenberg V, Ribechini E, Rossner S, Lutz MB. 2009. Myeloid-derived suppressor cell  
916 activation by combined LPS and IFN-gamma treatment impairs DC development. *Eur J*  
917 *Immunol* 39:2865-76.
- 918 95. Jiang M, Chen J, Zhang W, Zhang R, Ye Y, Liu P, Yu W, Wei F, Ren X, Yu J. 2017. Interleukin-6  
919 Trans-Signaling Pathway Promotes Immunosuppressive Myeloid-Derived Suppressor Cells  
920 via Suppression of Suppressor of Cytokine Signaling 3 in Breast Cancer. *Front Immunol*  
921 8:1840.
- 922 96. Miossec P, Kolls JK. 2012. Targeting IL-17 and TH17 cells in chronic inflammation. *Nat Rev*  
923 *Drug Discov* 11:763-76.
- 924 97. Forbes BR, Wannan JS, Kirkland WB. 1954. Indolent cutaneous ulceration due to infection  
925 with *Mycobacterium ulcerans*. *Med J Aust* 41:475-9.
- 926 98. Adusumilli S, Mve-Obiang A, Sparer T, Meyers W, Hayman J, Small PL. 2005.  
927 *Mycobacterium ulcerans* toxic macrolide, mycolactone modulates the host immune  
928 response and cellular location of M. ulcerans in vitro and in vivo. *Cell Microbiol* 7:1295-304.
- 929 99. Ogbechi J, Ruf MT, Hall BS, Bodman-Smith K, Vogel M, Wu HL, Stainer A, Esmon CT,  
930 Ahnstrom J, Pluschke G, Simmonds RE. 2015. Mycolactone-Dependent Depletion of  
931 Endothelial Cell Thrombomodulin Is Strongly Associated with Fibrin Deposition in Buruli  
932 Ulcer Lesions. *PLoS Pathog* 11:e1005011.
- 933 100. George KM, Pascopella L, Welty DM, Small PL. 2000. A *Mycobacterium ulcerans* toxin,  
934 mycolactone, causes apoptosis in guinea pig ulcers and tissue culture cells. *Infect Immun*  
935 68:877-83.
- 936 101. Hong H, Gates PJ, Staunton J, Stinear T, Cole ST, Leadlay PF, Spencer JB. 2003. Identification  
937 using LC-MSn of co-metabolites in the biosynthesis of the polyketide toxin mycolactone by  
938 a clinical isolate of *Mycobacterium ulcerans*. *Chem Commun (Camb)*:2822-3.
- 939 102. Laemmli UK. 1970. Cleavage of structural proteins during the assembly of the head of  
940 bacteriophage T4. *Nature* 227:680-5.
- 941 103. Sekiya T, Yamagishi J, Gray JHV, Whitney PG, Martinelli A, Zeng W, Wong CY, Sugimoto C,  
942 Jackson DC, Chua BY. 2017. PEGylation of a TLR2-agonist-based vaccine delivery system  
943 improves antigen trafficking and the magnitude of ensuing antibody and CD8(+) T cell  
944 responses. *Biomaterials* 137:61-72.
- 945 104. Wijayadikusumah AR, Zeng W, McQuilten HA, Wong CY, Jackson DC, Chua BY. 2019.  
946 Geometry of a TLR2-Agonist-Based Adjuvant Can Affect the Resulting Antigen-Specific  
947 Immune Response. *Mol Pharm* 16:2037-2047.
- 948 105. Chua BY, Pejowski D, Turner SJ, Zeng W, Jackson DC. 2011. Soluble proteins induce strong  
949 CD8+ T cell and antibody responses through electrostatic association with simple cationic  
950 or anionic lipopeptides that target TLR2. *J Immunol* 187:1692-701.
- 951 106. Beasley TM, Erickson S, Allison DB. 2009. Rank-based inverse normal transformations are  
952 increasingly used, but are they merited? *Behav Genet* 39:580-95.
- 953 107. Pedregosa F, Varoquaux G, Gramfort A, Michel V, Thirion B, Grisel O, Blondel M,  
954 Prettenhofer P, Weiss R, Dubourg V, Vanderplas J, Passos A, Cournapeau D, Brucher M,  
955 Perrot M, Duchesnay E. 2011. Scikit-learn: Machine Learning in Python. *J Mach Learn Res*  
956 12:2825-2830.

- 957 108. Polsterl S, Gupta P, Wang L, Conjeti S, Katouzian A, Navab N. 2016. Heterogeneous  
958 ensembles for predicting survival of metastatic, castrate-resistant prostate cancer patients.  
959 F1000Res 5:2676.
- 960 109. Evers L, Messow CM. 2008. Sparse kernel methods for high-dimensional survival data.  
961 Bioinformatics 24:1632-8.
- 962 110. Shivaswamy PK, Chu W, Jansche M. 2007. A support vector approach to censored targets.  
963 Icdm 2007: Proceedings of the Seventh Ieee International Conference on Data Mining  
964 doi:10.1109/Icdm.2007.93:655-+.
- 965 111. van der Maaten L, Hinton G. 2008. Visualizing Data using t-SNE. J Mach Learn Res 9:2579-  
966 2605.
- 967 112. Team RC. 2014. R: A Language and Environment for Statistical Computing, R Foundation for  
968 Statistical Computing, Vienna, Austria. <http://www.R-project.org/>.
- 969 113. Bolz M, Kerber S, Zimmer G, Pluschke G. 2015. Use of Recombinant Virus Replicon Particles  
970 for Vaccination against Mycobacterium ulcerans Disease. PLoS Negl Trop Dis 9:e0004011.
- 971 114. Fenner F. 1957. Homologous and heterologous immunity in infections of mice with  
972 *Mycobacterium ulcerans* and *Mycobacterium balnei*. Am Rev Tuberc 76:76-89.  
973

974

**Table 1. Summary of putative *M. ulcerans* vaccines tested in murine model of BU infection.**

| Vaccine type          | Description of components                                                                                                                                     | <i>M. ulcerans</i> challenge dose                                                          | Test for mycolactone production <sup>a</sup> | Challenge model | Efficacy compared to BCG     | Ref      |
|-----------------------|---------------------------------------------------------------------------------------------------------------------------------------------------------------|--------------------------------------------------------------------------------------------|----------------------------------------------|-----------------|------------------------------|----------|
| DNA-based             | pCDNA3 vector encoding Hsp65                                                                                                                                  | 10 <sup>4</sup> AFB (strain 1615 ATCC35840)                                                | Not mentioned                                | Tail            | Less protective              | (52)     |
| DNA-based             | V1Jns.tPA vector encoding Ag85A                                                                                                                               | 3 x 10 <sup>4</sup> AFB (strain 5150) or 10 <sup>5</sup> AFB (strain 04-855)               | Not mentioned                                | Footpad         | Less protective              | (32, 33) |
| DNA-based             | Primary vaccination with V1Jns.tPA plasmid encoding mycolactone polyketide domains and boosted with recombinant domain proteins emulsified in Gerbu adjuvant. | 10 <sup>5</sup> AFB (strain 1615)                                                          | Not mentioned                                | Footpad         | Less protective              | (49)     |
| Viral                 | Vesicular stomatitis virus (VSV) replicon particles expressing <i>M. ulcerans</i> codon optimised antigens MUL_2232 and MUL_3720                              | 30µl of 2.8 x 10 <sup>5</sup> CFU/ml stock (8.4 x 10 <sup>3</sup> CFU/dose) (strain S1013) | Not mentioned                                | Footpad         | Less protective              | (113)    |
| Subunit               | MUL2232 and MUL3720 adjuvanted with GLA-SE (EM408)                                                                                                            | 1.5 x 10 <sup>6</sup> or 1.5 x 10 <sup>5</sup> CFU (strain S1013)                          | Not mentioned                                | Footpad         | Less protective              | (34)     |
| Live Cell             | <i>M. ulcerans</i>                                                                                                                                            | 10 <sup>6.3</sup> or 10 <sup>4.3</sup> viable bacteria                                     | Not mentioned                                | Footpad         | Less protective              | (114)    |
| Live cell             | <i>M. marinum</i>                                                                                                                                             | 10 <sup>5</sup> bacteria (strain 1615)                                                     | Not mentioned                                | Footpad         | More protective <sup>b</sup> | (35)     |
| Live cell recombinant | <i>M. marinum</i> expressing Ag85A (on vector)                                                                                                                | 10 <sup>5</sup> bacteria (strain 1615)                                                     | Not mentioned                                | Footpad         | More protective <sup>b</sup> | (35)     |
| Live cell recombinant | <i>M. bovis</i> BCG expressing Ag85A (on vector pMV261)                                                                                                       | 10 <sup>5</sup> bacteria (strain 1615)                                                     | Not mentioned                                | Footpad         | More protective              | (36)     |
| Live cell recombinant | <i>M. bovis</i> BCG expressing Ag85B-EsxH fusion protein Ag85A (on vector pMV261)                                                                             | 10 <sup>5</sup> bacteria (strain 1615)                                                     | Not mentioned                                | Footpad         | More protective              | (37)     |

|                        |                                                                        |                                                                |               |         |                 |      |
|------------------------|------------------------------------------------------------------------|----------------------------------------------------------------|---------------|---------|-----------------|------|
| Inactivated whole cell | Mycolactone-negative <i>M. ulcerans</i> (strain 5114)                  | 4 log <sub>10</sub> or 3 log <sub>10</sub> CFU (strain 98-912) | Not mentioned | Footpad | Less protective | (25) |
| Inactivated whole cell | Mycolactone-deficient attenuated <i>M. ulcerans</i> (strain ATCC19423) | 10 <sup>6</sup> bacteria (strain TMC1615)                      | Not mentioned | Footpad | Not compared    | (54) |
| Inactivated whole cell | Formalin-treated <i>M. ulcerans</i> (strain TMC1615)                   | 10 <sup>6</sup> bacteria (strain TMC1615)                      | Not mentioned | Footpad | Not compared    | (54) |
| Inactivated whole cell | Dewaxed <i>M. ulcerans</i> (strain TMC1615)                            | 10 <sup>6</sup> bacteria (strain TMC1615)                      | Not mentioned | Footpad | Not compared    | (54) |
| Phage                  | Mycobacteriophage D29 (therapeutic vaccine)                            | 5.5 log <sub>10</sub> AFB (strain 1615)                        | Not mentioned | Footpad | Not comparable  | (53) |

976 <sup>a</sup> Identifying whether the bacterial culture used for challenge was assessed for mycolactone production before infection.

977 <sup>b</sup> Vaccine was more protective than the BCG vaccine, however all mice eventually developed footpad swelling.

978

979

980 **Table 2:** High-scoring immune features associated with delayed bioluminescence

| Feature number | Feature                       | Tissue site | Association with delayed bioluminescence | Concordance index |
|----------------|-------------------------------|-------------|------------------------------------------|-------------------|
| 1.             | IFN-γ                         | spleen      | negative                                 | 0.786             |
| 2.             | IL-2                          | spleen      | positive                                 | 0.769             |
| 3.             | IL-6                          | spleen      | negative                                 | 0.759             |
| 4.             | TNF-α                         | spleen      | negative                                 | 0.745             |
| 5.             | IL-2                          | lymph node  | positive                                 | 0.715             |
| 6.             | IFN-γ CD4 <sup>+</sup> T-cell | spleen      | negative                                 | 0.707             |

981

982 **Figures:**  
 983 **Figure 1**

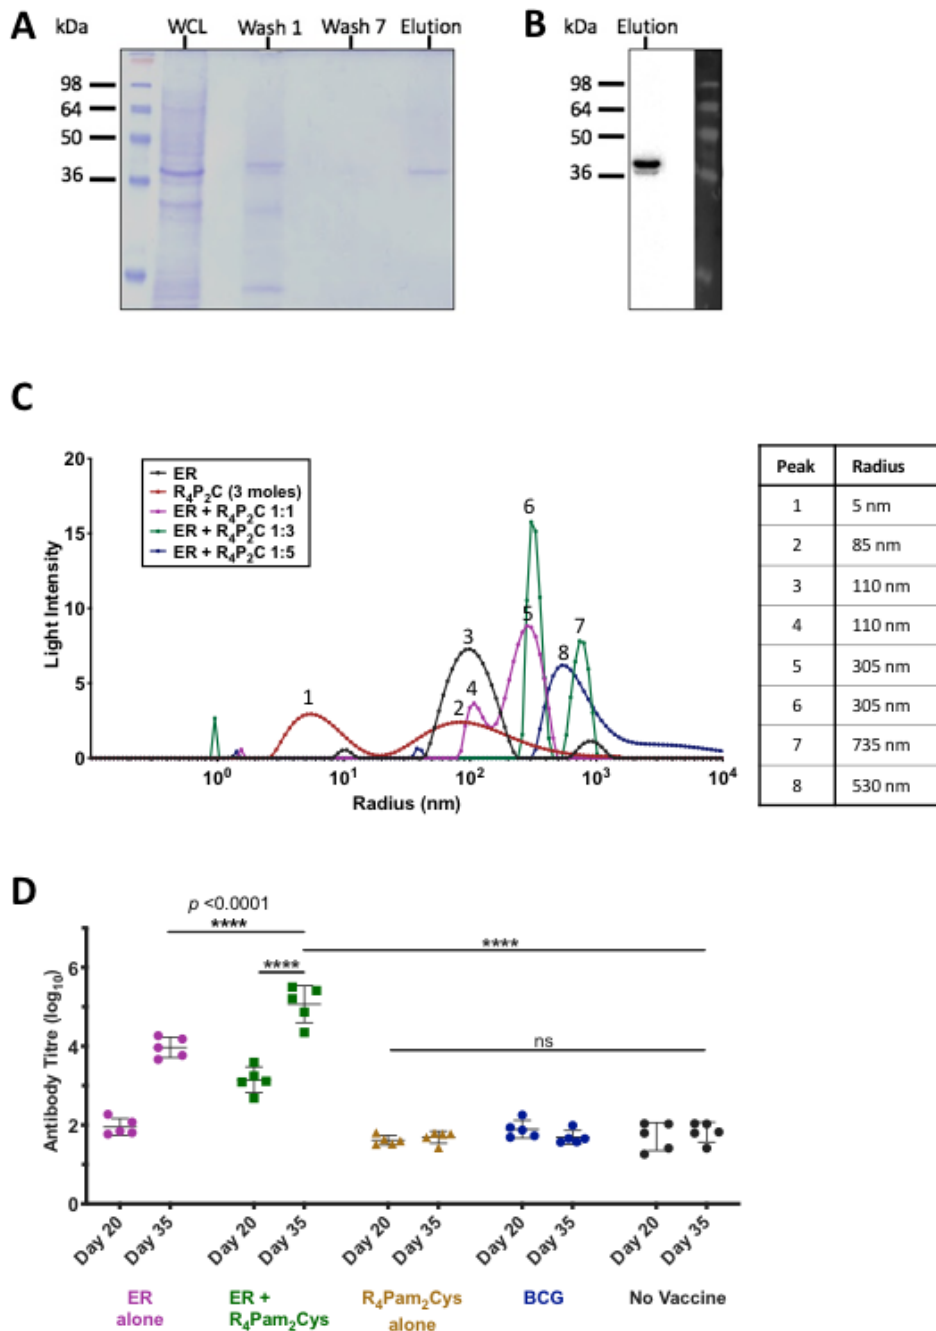

984

985

986 **Figure 1. Analysis of purified recombinant ER protein antigen characteristics and formulation with**

987 **R<sub>4</sub>Pam<sub>2</sub>Cys. (A)** The presence of recombinant ER protein (~37 kDa) was monitored by SDS-PAGE at

988 each stage of the purification process; Lane: 1 - Whole cell lysate (WCL), Lane 2 - Wash 1, Lane 3 -

989 Wash 7 and Lane 4 – ER protein elution (containing 10  $\mu$ g protein). **(B)** Western Blot using an anti-

990 6xHIS-tag antibody to detect the presence of a single band corresponding to the correct molecular  
991 weight of the ER protein in the final eluate. **(C)** To analyse the formation of antigen-lipopeptide  
992 complexes, a constant amount of antigen was mixed with lipopeptide at different  
993 protein:lipopeptide molecular ratios in 50µl of PBS. The size distribution of particles was then  
994 analysed by DLS with each profile depicting the hydrodynamic radius (nm) of complexes in each  
995 solution. The average radius of each formulation is highlighted in the accompanying table. **(D)**  
996 BALB/c mice (n=5/group) were vaccinated on day 0 and day 21 with R<sub>4</sub>Pam<sub>2</sub>Cys alone, ER antigen  
997 alone or antigen formulated with R<sub>4</sub>Pam<sub>2</sub>Cys or vaccinated with BCG on day 0 only. Total serum  
998 (IgG) antibody against recombinant ER protein were measured by ELISA after the primary dose (day  
999 20) and two weeks after the secondary dose (day 35). Statistical tests were conducted at the 5%  
1000 significance level. The null hypothesis was rejected if there was a significant difference in mean  
1001 antibody responses between treatment groups. Note: \* $p < 0.05$ , \*\* $p < 0.01$ , \*\*\* $p < 0.001$  or \*\*\*\* $p$   
1002  $< 0.0001$ . The error bars represent standard deviation (n=5).

1003

1004

1005

1006 Figure. 2

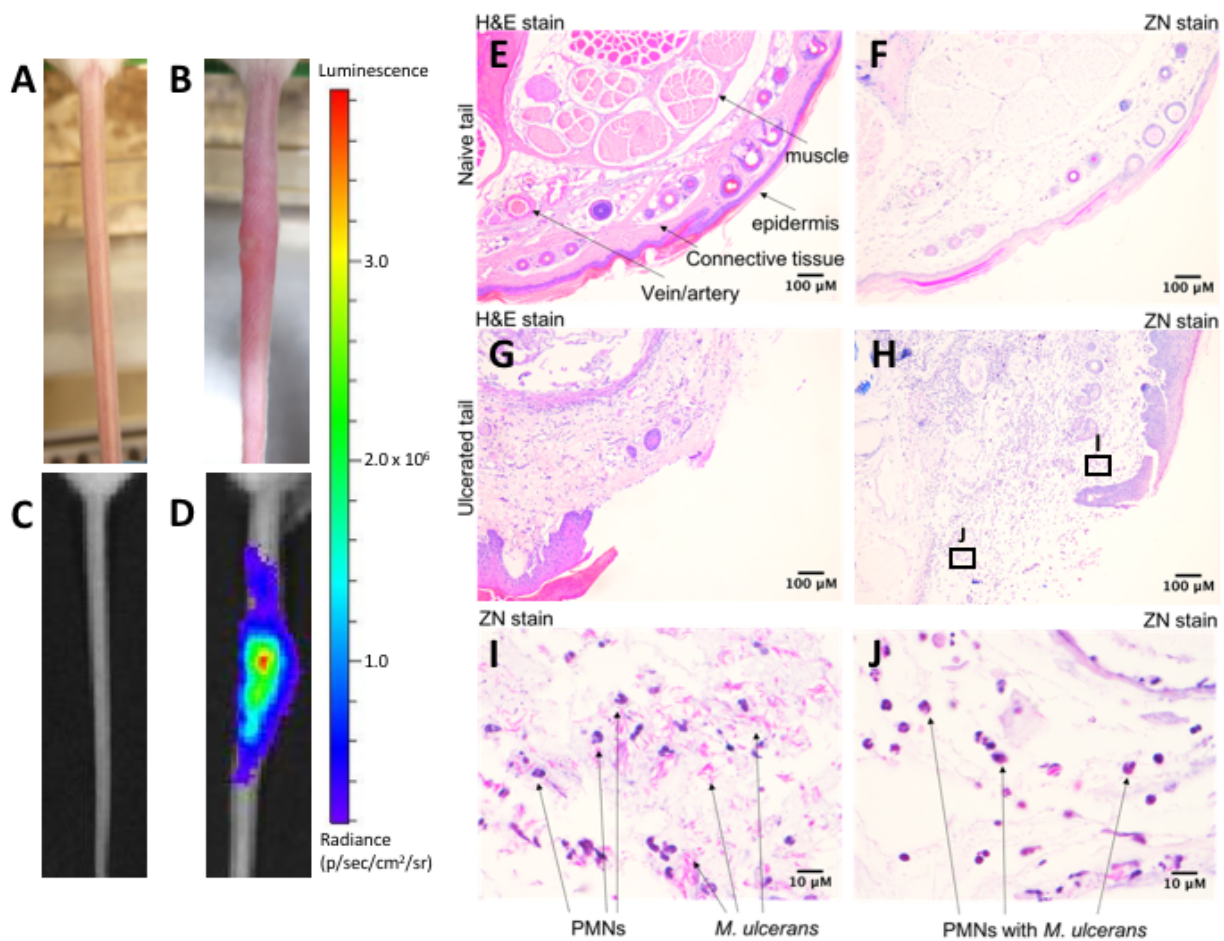

1007

1008 **Figure 2. Characterisation of infection using a low-dose bioluminescent *M. ulcerans* strain.**

1009 Representative light camera images of tails from (A) an uninfected BALB/c mouse or (B) at the point  
1010 of ulceration (16 weeks) following intradermal inoculation with 20 CFU of bioluminescent *M.*  
1011 *ulcerans*. (C, D) The same tails were visualised under an IVIS camera to detect and quantify  
1012 bioluminescence intensity (as photons/sec). Histological cross section of an (E, F) uninfected or (G,  
1013 H) infected tail tissue following haematoxylin & eosin (H&E) and Ziehl-Neelson (ZN) staining.  
1014 Zoomed images of the regions indicated within the denoted boxes of (H) and depicts the presence  
1015 of polymorphonuclear cells (PMNs) and acid-fast bacilli (ZN staining) within tissue (I, J).

1016

1017 Figure. 3

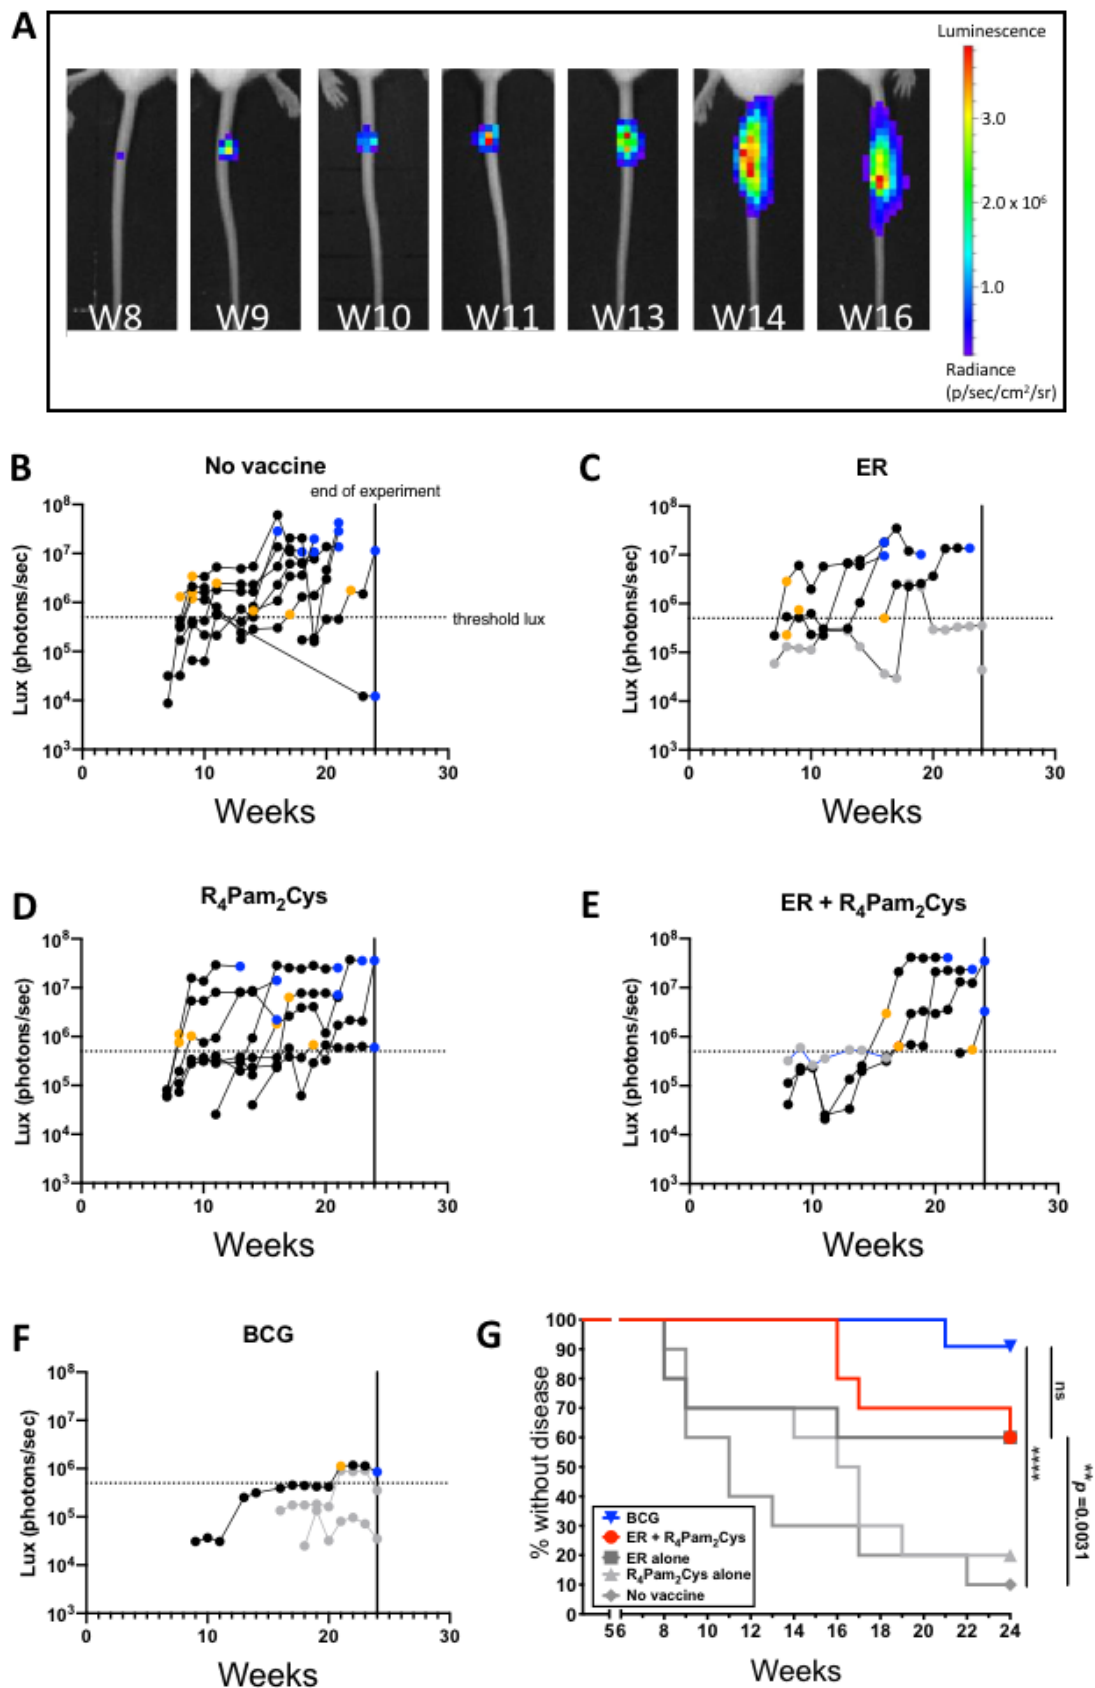

1018

1019 **Figure 3. Development of BU over time after vaccination.** (A) Tails of mice were intradermally  
 1020 infected with 20 CFU of bioluminescent *M. ulcerans* and imaged weekly by IVIS. Representative



1021 panels depict the weekly progression of bioluminescent *M. ulcerans* burden in the tail of an  
1022 unvaccinated mouse over the course of 16 weeks expressed as photons/second. BALB/c mice  
1023 (n=10/group) were left **(B)** unvaccinated, or vaccinated on day 0 and day 21 with **(C)** ER antigen  
1024 alone, **(D)** R<sub>4</sub>Pam<sub>2</sub>Cys alone, , **(E)** ER antigen formulated with R<sub>4</sub>Pam<sub>2</sub>Cys or **(F)** on day 0 with BCG  
1025 followed by challenge on week 5 with bioluminescent *M. ulcerans*. Threshold bioluminescence  
1026 (threshold lux) for disease was defined as  $\geq 5 \times 10^5$  photons/second (p/s) as mice that reached this  
1027 level typically progressed to the clinical (ethical) end point. Mice were classified as diseased if they  
1028 reached this end point within the 24-weeks following challenge or if their bioluminescence value at  
1029 week 24 was  $\geq 5 \times 10^5$  p/s. Mice were classified as protected if they did not reach this clinical end  
1030 point and their bioluminescence value was  $< 5 \times 10^5$  photons/second. The data point depicting when  
1031 an infected mouse first exhibited bioluminescence at  $\geq 5 \times 10^5$  p/s is represented with a yellow  
1032 symbol. The data point denoting when a mouse reached clinical endpoint is represented with a blue  
1033 symbol. Protected mice with detectable bioluminescence are depicted as grey symbols. **G.** Time to  
1034 bioluminescence measured by IVIS. A survival curve was utilised to analyse the time (weeks) taken  
1035 for each BU diseased mouse to first reach threshold bioluminescence  $\geq 5 \times 10^5$  photons/second. BCG  
1036 group (upside down triangle) is labelled in blue, ER + R<sub>4</sub>Pam<sub>2</sub>Cys (circle) is red, and ER alone (square),  
1037 R<sub>4</sub>Pam<sub>2</sub>Cys alone (upright triangle) and no vaccine (diamond) groups are depicted in grey. Statistical  
1038 tests were conducted at the 5% significance level. The null hypothesis was rejected if there was a  
1039 significant difference in survival between groups. Note: \* $p < 0.05$ , \*\* $p < 0.01$ , \*\*\* $p < 0.001$  or \*\*\*\* $p$   
1040  $< 0.0001$ .

1041

1042 Figure 4

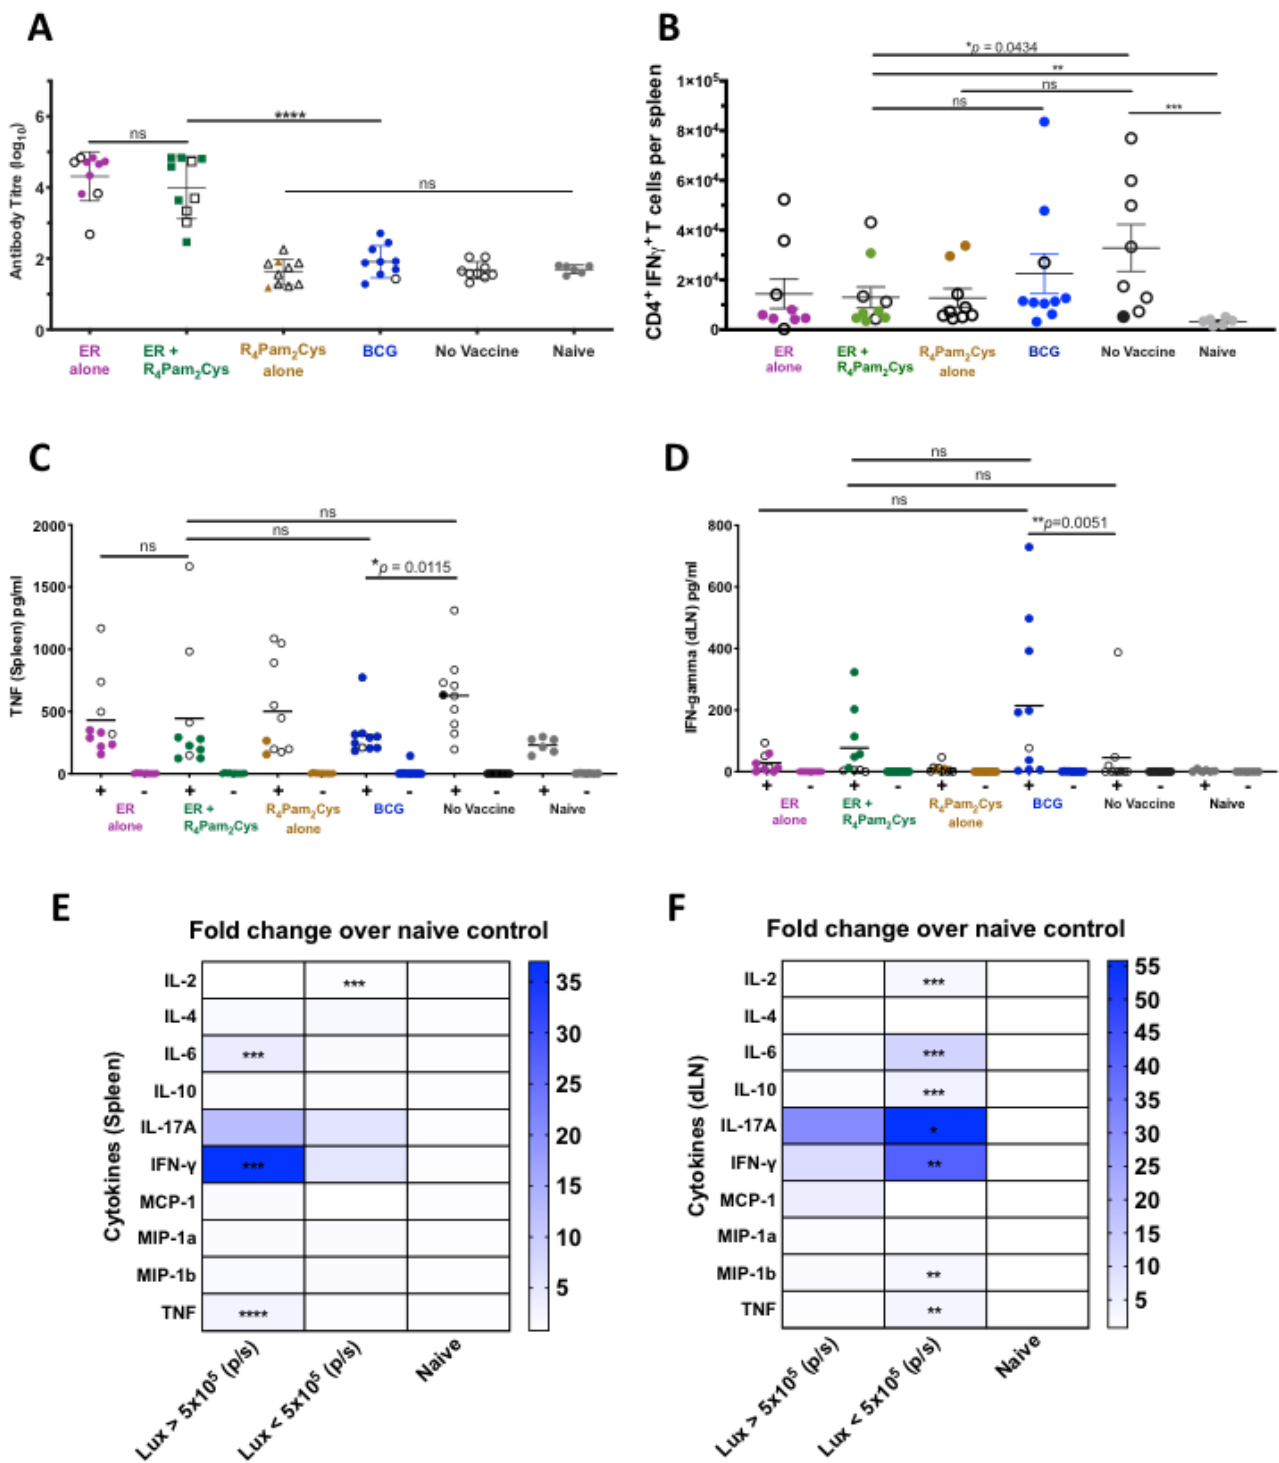

1043

1044 **Figure 4. Immune responses after *M. ulcerans* infection.** BALB/c mice (n=10/group) were left  
 1045 unvaccinated or vaccinated on day 0 and day 21 with ER antigen alone, ER antigen formulated with  
 1046 R<sub>4</sub>Pam<sub>2</sub>Cys, R<sub>4</sub>Pam<sub>2</sub>Cys alone, or on day 0 with BCG followed by challenge on day 36 with  
 1047 bioluminescent *M. ulcerans*. **(A)** Total serum (IgG) antibody against recombinant ER protein were  
 1048 measured by ELISA after the experimental end point. All data points for diseased mice

1049 (bioluminescence  $\geq 5 \times 10^5$  p/s) are depicted with white symbols. Statistical tests were conducted at  
1050 the 5% significance level. The null hypothesis was rejected if there was a significant difference in  
1051 mean antibody responses between treatment groups. The error bars represent standard deviation.  
1052 **(B)** After experimental end point was reached, CD4+ IFN- $\gamma$ + T cells were enumerated from the spleen  
1053 of mice in response to ER protein. The null hypothesis was rejected if there was a significant  
1054 difference in mean CD4+ IFN- $\gamma$ + T cells between treatment groups. Once experimental end point  
1055 was reached, cytokines from draining lymph nodes and spleens of *M. ulcerans* challenged mice were  
1056 also measured in response to *in vitro* cell stimulation with recombinant ER protein (Supplementary  
1057 Table S1). Shown here are cytokine titres **(C)** IFN- $\gamma$  produced from immune cells in the draining  
1058 lymph nodes and **(D)** TNF produced from immune cells in the spleen. The null hypothesis was  
1059 rejected if there was no difference in mean cytokine titres between treatment groups. The black  
1060 bars represent the mean. Fold change of mean cytokine titres from protected mice  
1061 (bioluminescence  $< 5 \times 10^5$  p/s) and diseased mice (bioluminescence  $\geq 5 \times 10^5$  p/s) over naïve mice  
1062 were compared in the **(E)** spleen and **(F)** draining lymph nodes. The null hypothesis was rejected if  
1063 there was a significant difference in mean cytokine titres between treatment groups. All statistical  
1064 tests were conducted at the 5% significance level. Note: \* $p < 0.05$ , \*\* $p < 0.01$ , \*\*\* $p < 0.001$  or \*\*\*\* $p$   
1065  $< 0.0001$ .  
1066

1067 Figure 5

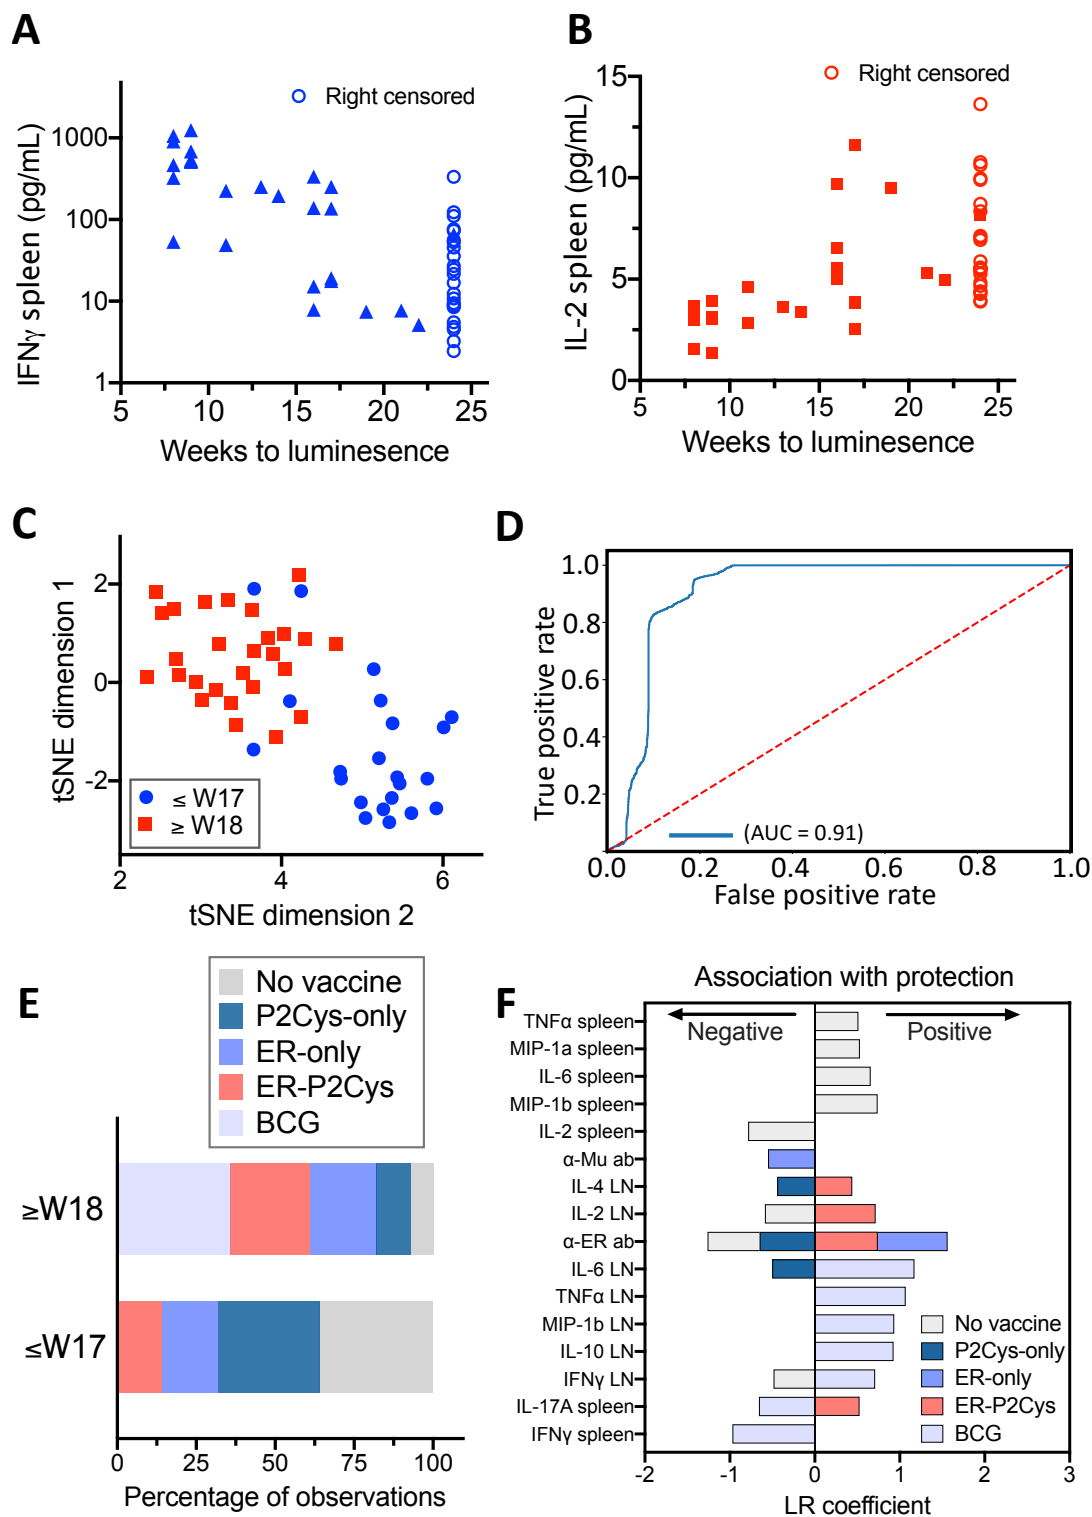

1068

1069 **Figure 5. Statistical modelling to identify immune parameters (features) associated with vaccine**  
 1070 **protection.** Univariate Cox Proportional hazards models were specified for each of the 28  
 1071 immunological features to test their association with the response variable (time-to-  
 1072 bioluminescence measured in weeks). The resulting concordance index (CI) scores were obtained

1073 and the six features with a CI >0.7 were retained. The inverse associations of the top two features  
1074 **(A)** IFN- $\gamma$  and **(B)** IL-2 produced in murine splenocytes at the experimental end-point. **(C)** Plot  
1075 depicting a two-dimensional representation of the top six features that associate with time-to-  
1076 bioluminescence from the unsupervised t-SNE. The shapes/colours indicate the two groups  
1077 identified through K-means clustering, of bioluminescence by 8-17 weeks or at 18 weeks and  
1078 beyond (up to 24 weeks). **(D)** Receiver operator curve (and corresponding area under curve),  
1079 displaying the trade-off between sensitivity and specificity across all thresholds for 1,000 random  
1080 train-test splits of a logistic regression classifier (90% of observations used for training). The red  
1081 dotted line depicts the expectation of a random classifier and the blue line depicts the model  
1082 performance. **(E)** Proportion of observations across treatment groups for each of the classes both  
1083 8-17 weeks and 18-24 weeks and those with no detection. **(F)** Group-specific univariate logistic  
1084 regression analyses for each of the five treatment groups. Model coefficients were used to  
1085 determine both the strength and direction of association of each feature with that of each  
1086 treatment group. Depicted are those features with a corresponding p-value<0.05 (Table S2).

1087

1088

1089

1090 **Supplementary data**

1091 **Table S1** - Vaccination data

1092 **Table S2** - Summary of group-specific univariate logistic regression coefficients

1093
